# Supplementary material for: Pd nanoparticles-decorated borophene nanosheets for intrinsic polarization-induced visible light photocatalysis
Source: Royal Society of Chemistry journal article supplement (doi:10.1039/d2cy02149h), 2023-01-01
Supplement: d2cy02149h1.pdf [file d2cy02149h1.pdf]

## Supporting Information

# **Pd nanoparticles decorated borophene nanosheets for intrinsic-polarization induced visible light photocatalysis**

*Bitan Pratihara,<sup>‡a</sup> Animesh Jana,<sup>‡a,b</sup> Souvik Biswas,<sup>c</sup> and Sirshendu De<sup>\*a</sup>*

<sup>a</sup> Department of Chemical Engineering, Indian Institute of Technology Kharagpur, Kharagpur 721302, India.

<sup>b</sup> CSIR-National Metallurgical Laboratory, Jamshedpur 83100, India.

<sup>c</sup> School of Medical Science and Technology Indian Institute of Technology Kharagpur, Kharagpur 721302, India.

<sup>‡</sup>These authors contributed equally

<sup>\*</sup>Corresponding author E-mail: sde@che.iitkgp.ac.in

.

## S1. Experimental Section

### S1.1. Materials

Boron ( $\geq 95\%$  (boron), MW: 10.81), Ciprofloxacin ( $\text{C}_{17}\text{H}_{18}\text{FN}_3\text{O}_3$ ,  $\geq 98\%$ , MW: 331.34), Ibuprofen ( $\text{C}_{13}\text{H}_{18}\text{O}_2$ ,  $\geq 98\%$ , MW: 206.28), Acetone ( $\text{CH}_3\text{COCH}_3$ ,  $\geq 99.5\%$ , MW: 58.08), 2-Propanol ( $(\text{CH}_3)_2\text{CHOH}$ ,  $\geq 99.5\%$ , MW: 60.10), Potassium bromide (KBr,  $\geq 99.0\%$ , MW: 119.00), Nafion (5 wt. % in lower aliphatic alcohols and water, contains 15-20% water), Sodium Sulphate ( $\text{Na}_2\text{SO}_4$ ,  $\geq 99.0\%$ , MW: 142.04), *tert*-butyl alcohol ( $(\text{CH}_3)_3\text{COH}$ ,  $\geq 99.5\%$ , MW: 74.12), *p*-Benzoquinone ( $\text{C}_6\text{H}_4(=\text{O})_2$ ,  $\geq 98\%$ , MW: 108.09), Potassium bromate,  $\geq 99.8\%$ , MW: 167.00), Acetonitrile ( $\text{CH}_3\text{CN}$ ,  $\geq 99.9\%$ , MW: 41.05), Formic acid ( $\text{HCOOH}$ ,  $\geq 96\%$ , MW: 46.03), Acetic acid ( $\text{CH}_3\text{CO}_2\text{H}$ ,  $\geq 99.7\%$ , MW: 60.05), Sodium phosphate dibasic heptahydrate ( $\text{Na}_2\text{HPO}_4 \cdot 7\text{H}_2\text{O}$ , 98.0-102.0%, MW: 268.07), Sodium chloride ( $\text{NaCl}$ ,  $\geq 99.0\%$ , MW: 58.44), Iron (II) sulphate heptahydrate ( $\text{FeSO}_4 \cdot 7\text{H}_2\text{O}$ ,  $\geq 99.0\%$ , MW: 278.01), Potassium dihydrogen phosphate ( $\text{KH}_2\text{PO}_4$ , MW: 136.09), Magnesium nitrate hexahydrate ( $\text{Mg}(\text{NO}_3)_2 \cdot 6\text{H}_2\text{O}$ , 99%, MW: 256.41), Indium tin oxide (ITO) were purchased from M/s, Sigma Aldrich, USA. Ethylene diamine tetra acetic acid disodium salt (EDTA-2Na, MW: 372.24) was procured from M/s. Merck Life Sciences Pvt. Ltd. Palladium chloride ( $\text{PdCl}_2$ , MW: 177.31), hydrazine hydrate ( $\text{N}_2\text{H}_5\text{OH}$ , 80%, MW: 50.06) and congo red ( $\text{C}_{32}\text{H}_{22}\text{N}_6\text{Na}_2\text{O}_6\text{S}_2$ , MW: 696.65) were obtained from M/s, Loba Chemie, Mumbai, India. Sodium hydroxide ( $\text{NaOH}$ , MW: 40) and nitric acid ( $\text{HNO}_3$ , 65%, MW: 63.01) were purchased from M/s, Merck (India) Ltd., Mumbai. Methanol ( $\text{CH}_3\text{OH}$ , MW: 32.04) was obtained from M/s. Spectrochem Pvt. Ltd., Mumbai, India. Ethanol ( $\text{CH}_3\text{CH}_2\text{OH}$ , 99.9%, MW: 46.07) was received from Jiangyin Darlly International Trade Co. Ltd., China.

Deionized (DI) water was used as a solvent for the preparation of all the solutions and was prepared from Millipore water purification system supplied by Merck (India) Pvt. Ltd. All the chemicals were of analytical grade and used as received without any further purification.

### S1.2. Electrochemical measurements

Indium tin oxide (ITO) ( $1 \times 1 \text{ cm}^2$ ) was sequentially cleaned in acetone, water, and ethanol for 30 min each using an ultrasonic cleaner and dried in a hot air oven at  $60^\circ\text{C}$ . A slurry of Pd-B catalyst (1 mL) was prepared (Nafion: 90  $\mu\text{L}$ , ethanol: 540  $\mu\text{L}$  and deionized water: 370  $\mu\text{L}$ ), ultrasonicated for 3 hrs, deposited on ITO, and dried in a hot air oven at  $60^\circ\text{C}$ . Electrochemical

studies were performed using Autolab (model: PGSTAT 302N, Metrohm Autolab B.V., Netherlands) in presence of visible light (24 W). All electrochemical measurements were performed in 0.1 M Na<sub>2</sub>SO<sub>4</sub> + 0.04 M KOH solution in standard three-electrode setup, with Ag/AgCl electrode as reference, platinum (Pt) as counter electrode, and Pd-B catalyst slurry coated on ITO as working electrode. To obtain the Nyquist diagram from Electrochemical Impedance Spectra EIS, the AC frequency with RMS amplitude of 10 mV was varied from 10 kHz to 1 Hz with a set potential of 0.6 V (Ag/AgCl). The EIS plot and corresponding Bode phase plot were analyzed using NOVA 1.0.1. Transient photocurrent measurements of the photocatalysts were performed using Potentiostat/ Galvanostat/ EIS workstation (model: ZIVE SP1, Korea) under a 150 W Xe lamp.

## S2. Results and Discussion

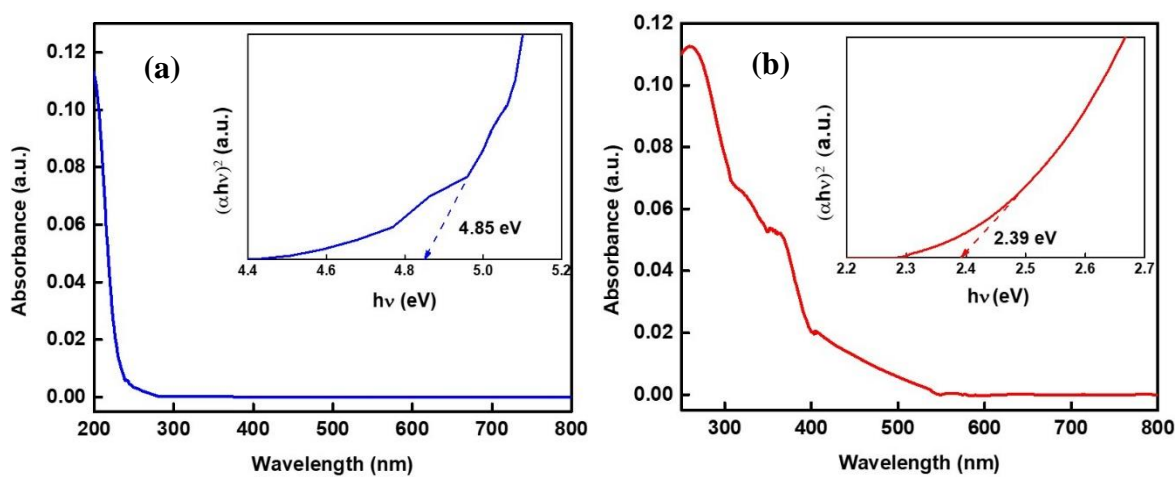

**Fig. S1.** UV-vis diffuse reflectance spectra of (a) borophene and (b) Pd-B.

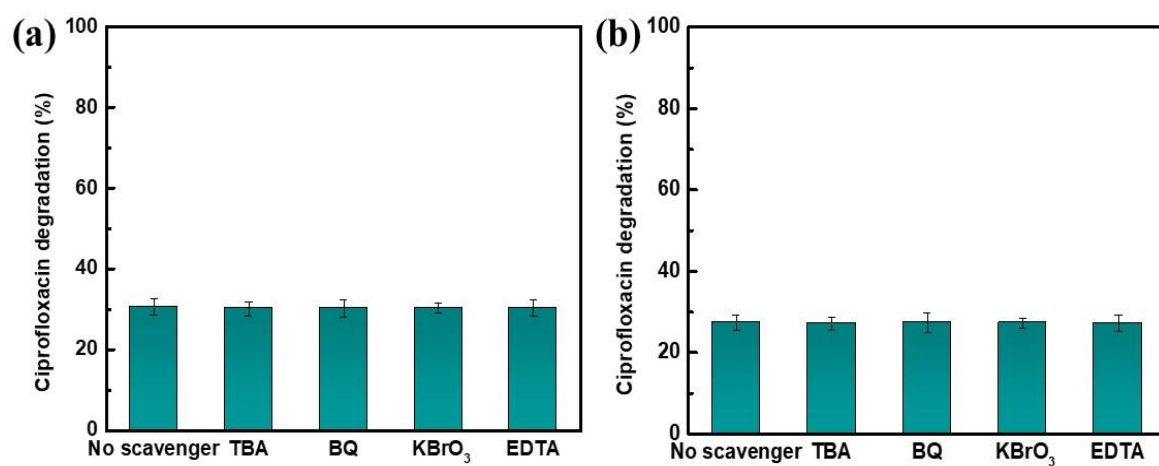

**Fig. S2.** CIP degradation efficiency of (a) borophene and (b) Pd nanoparticles in the presence of various quenching agents.

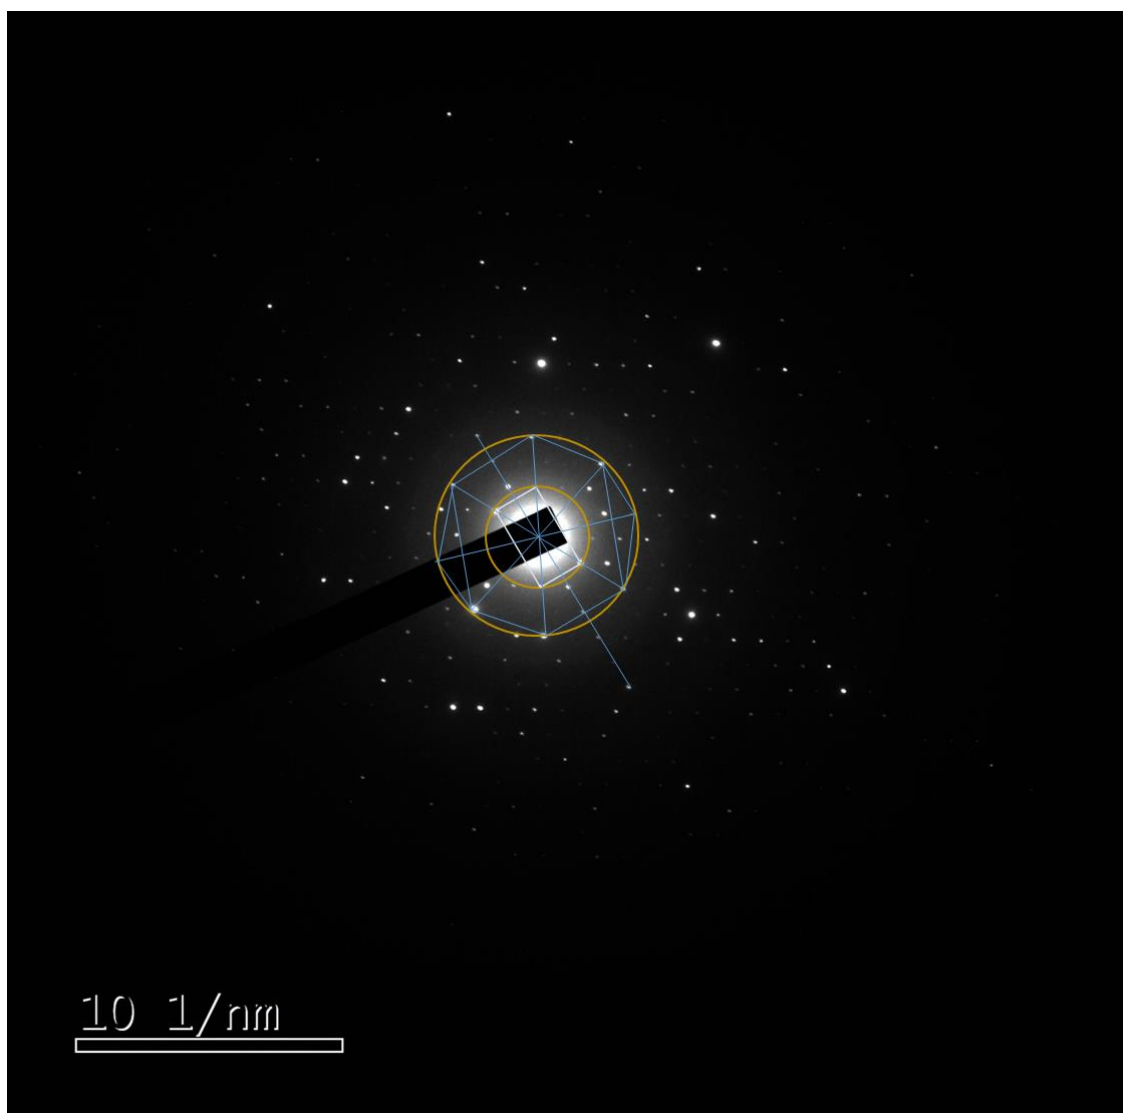

**Fig. S3.** SAED patterns showing six-fold and two-fold symmetry of freestanding borophene in acetone.

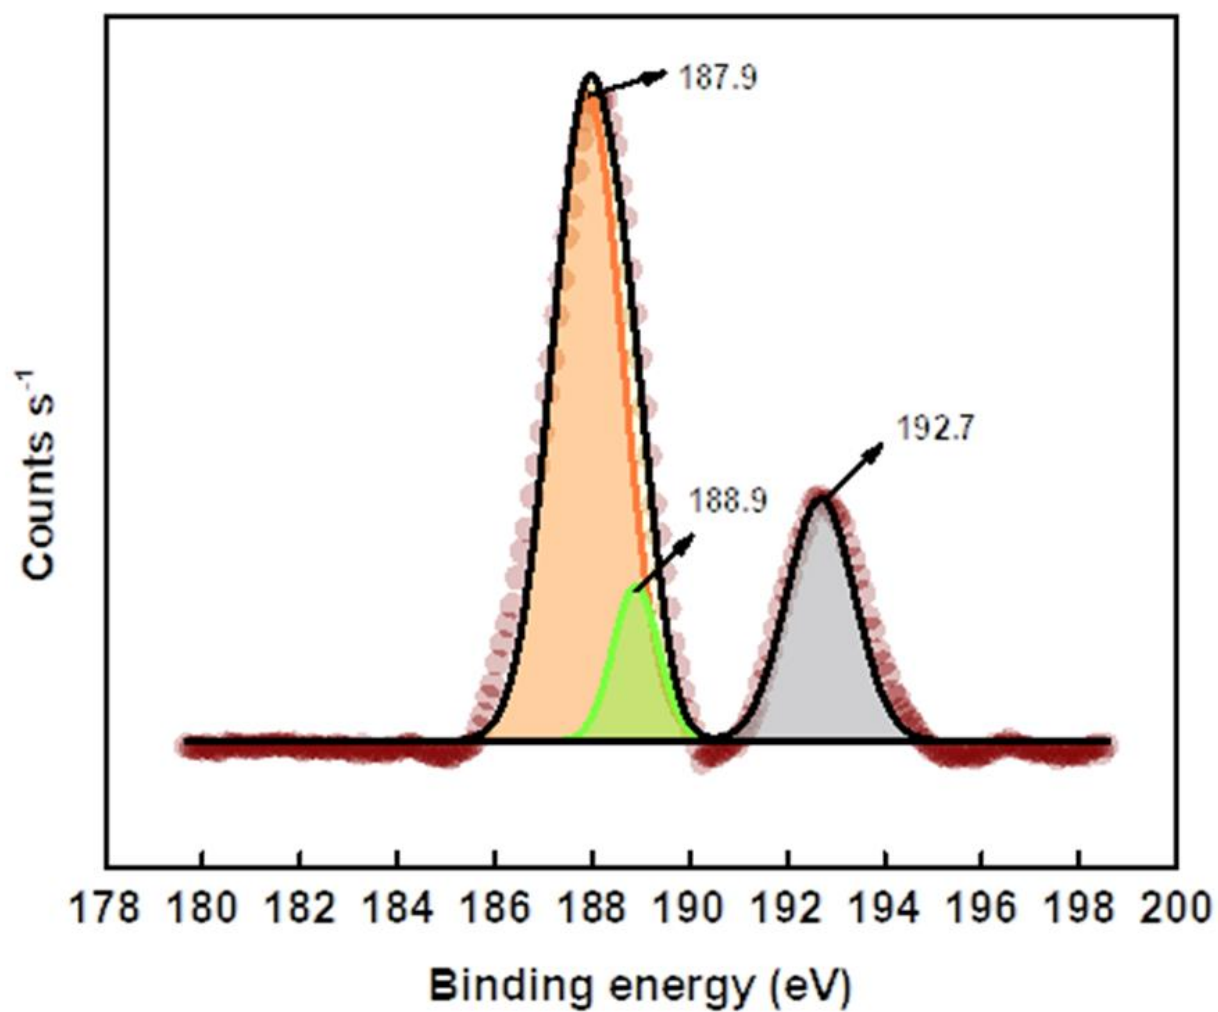

**Fig. S4.** Core level XPS spectra of B 1s in freestanding borophene in acetone. The left peaks at 187.9 eV and 188.9 eV correspond to B-B bonds, and peak at 192.7 eV corresponds to B-O bond.

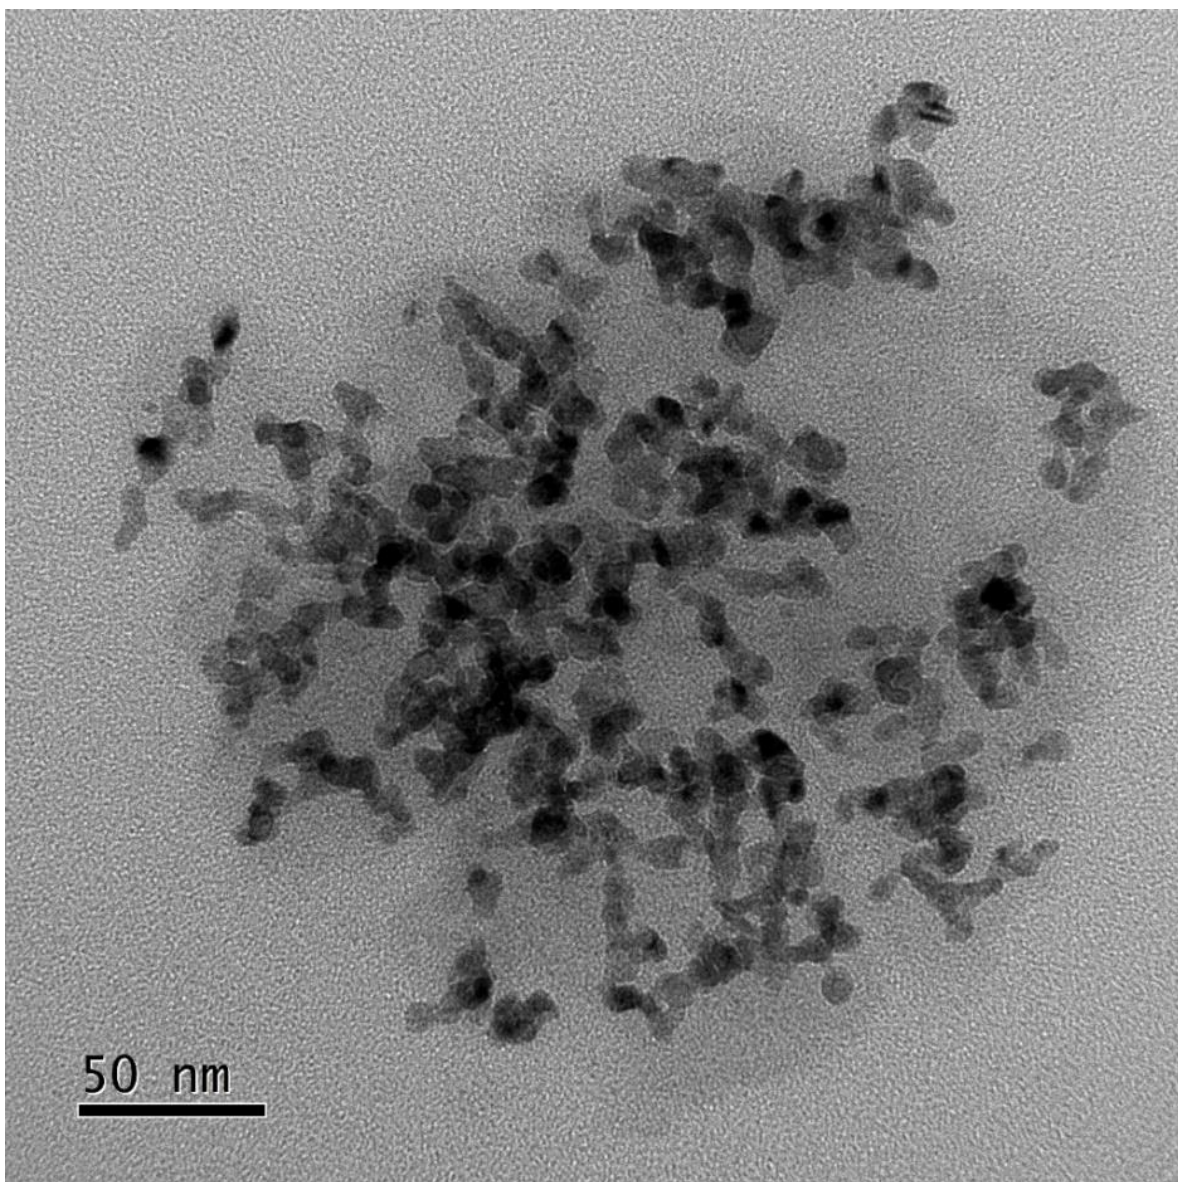

**Fig. S5.** TEM image of Pd-B catalyst showing plate like structure having size approximately 10 nm resulting in LSPR.

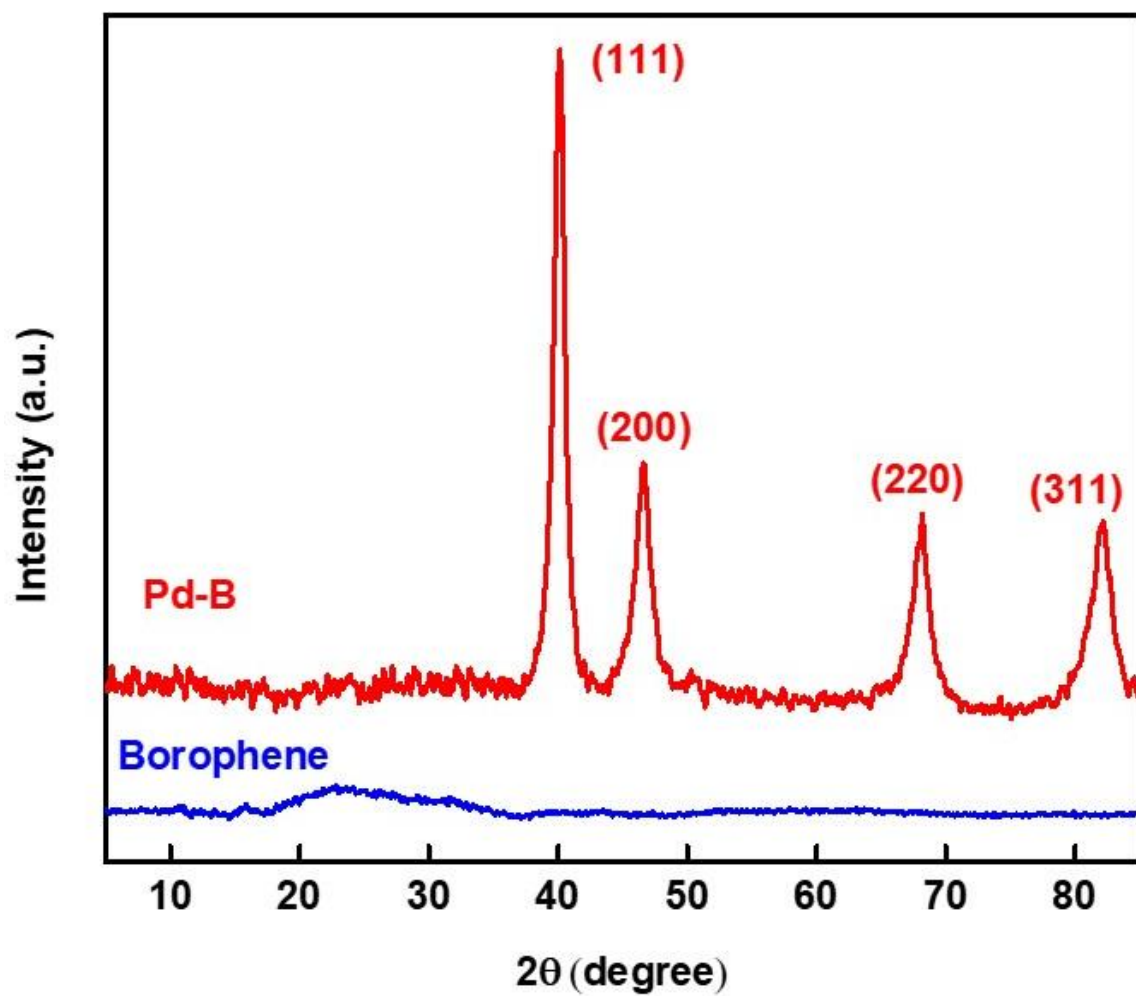

**Fig. S6.** XRD patterns of borophene and Pd-B.

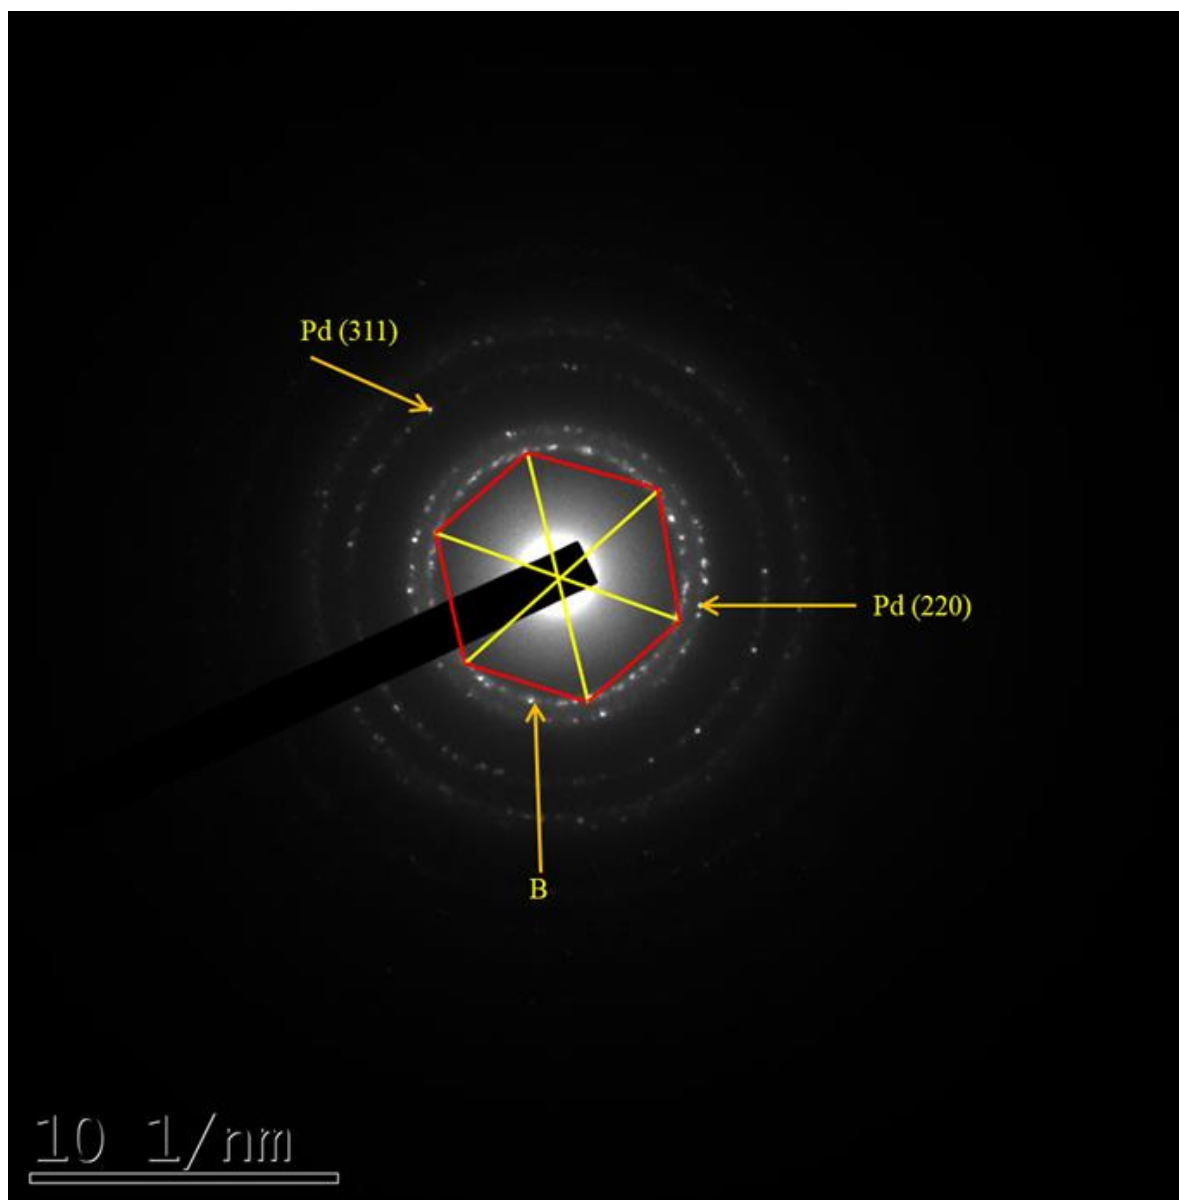

**Fig. S7.** SAED patterns of Pd-B catalyst showing six-fold symmetry of borophene along with facets of Pd.

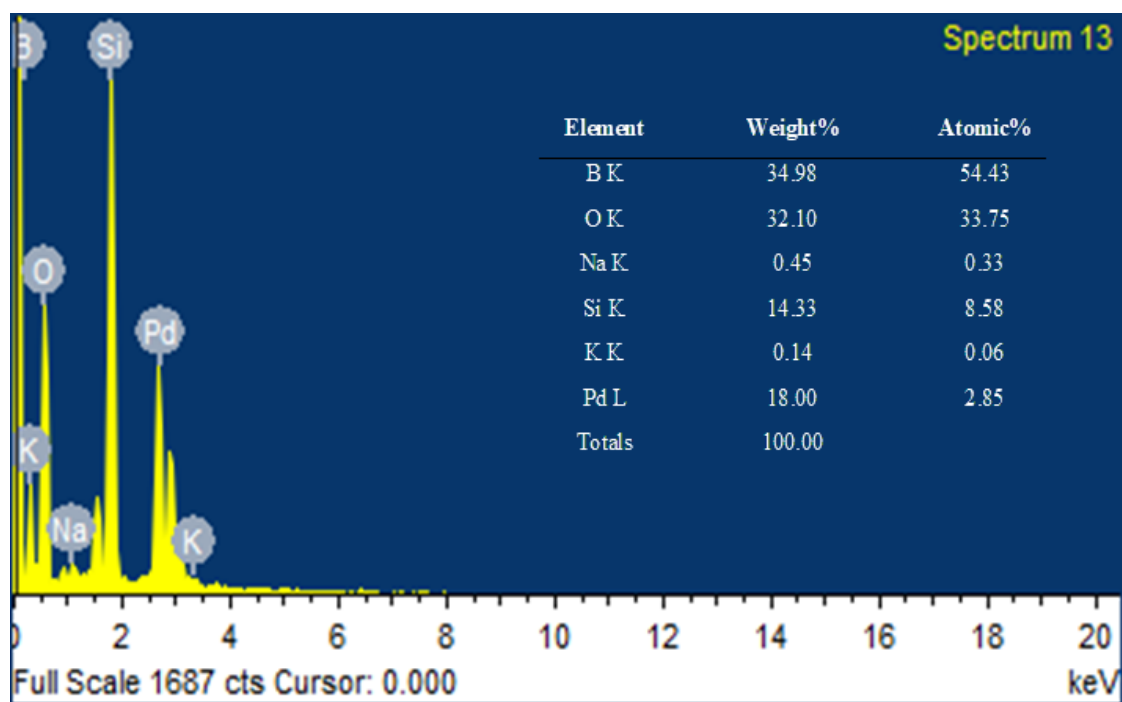

**Fig. S8.** Elemental analysis of catalyst by EDX, which shows 19.1:1 ratio of B:Pd in optimized catalyst. Silicon came from glass substrate where catalyst was coated for EDX analysis. Other elements came from impurity

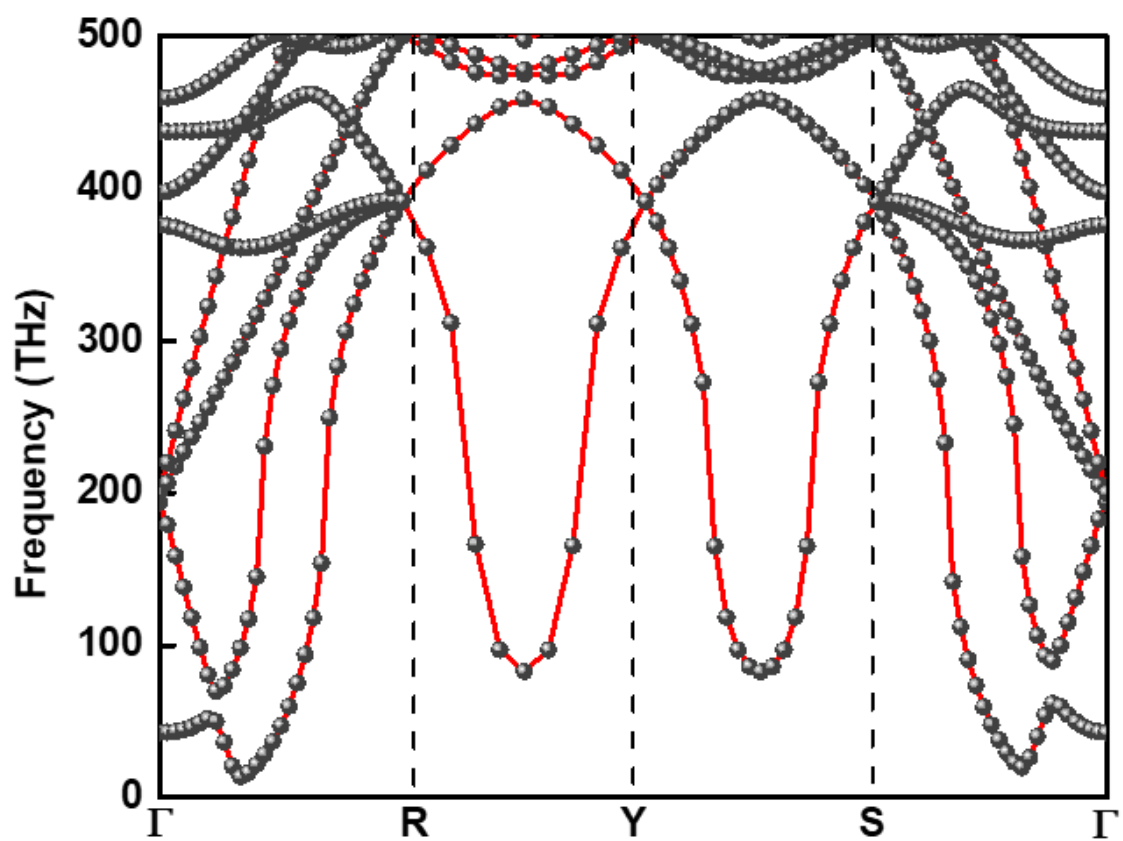

**Fig. S9.** Phonon dispersion calculation of borophene ( $\beta_{12}$ ).

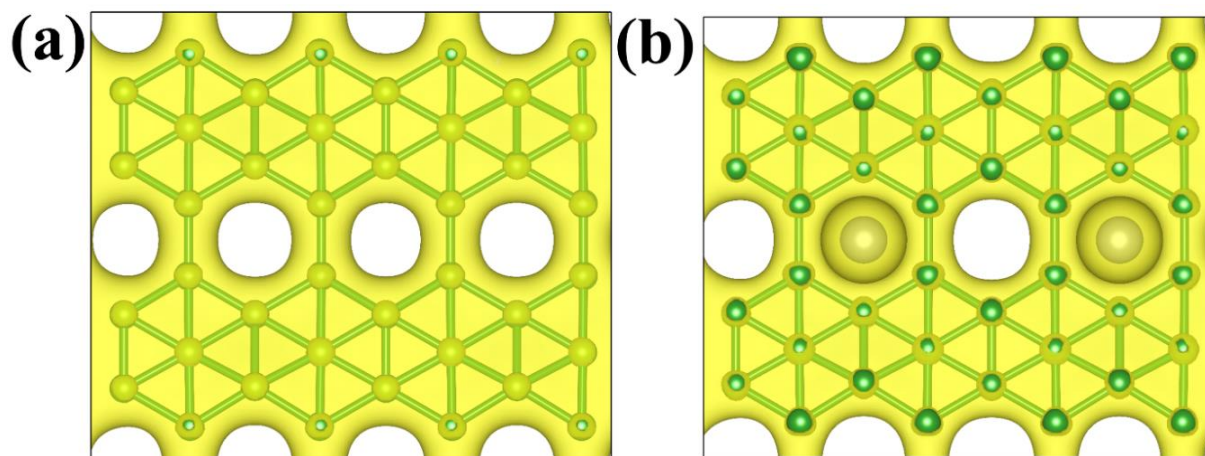

**Fig. S10.** Charge densities of (a) borophene and (b) Pd-B catalyst used in Bader charge analysis.

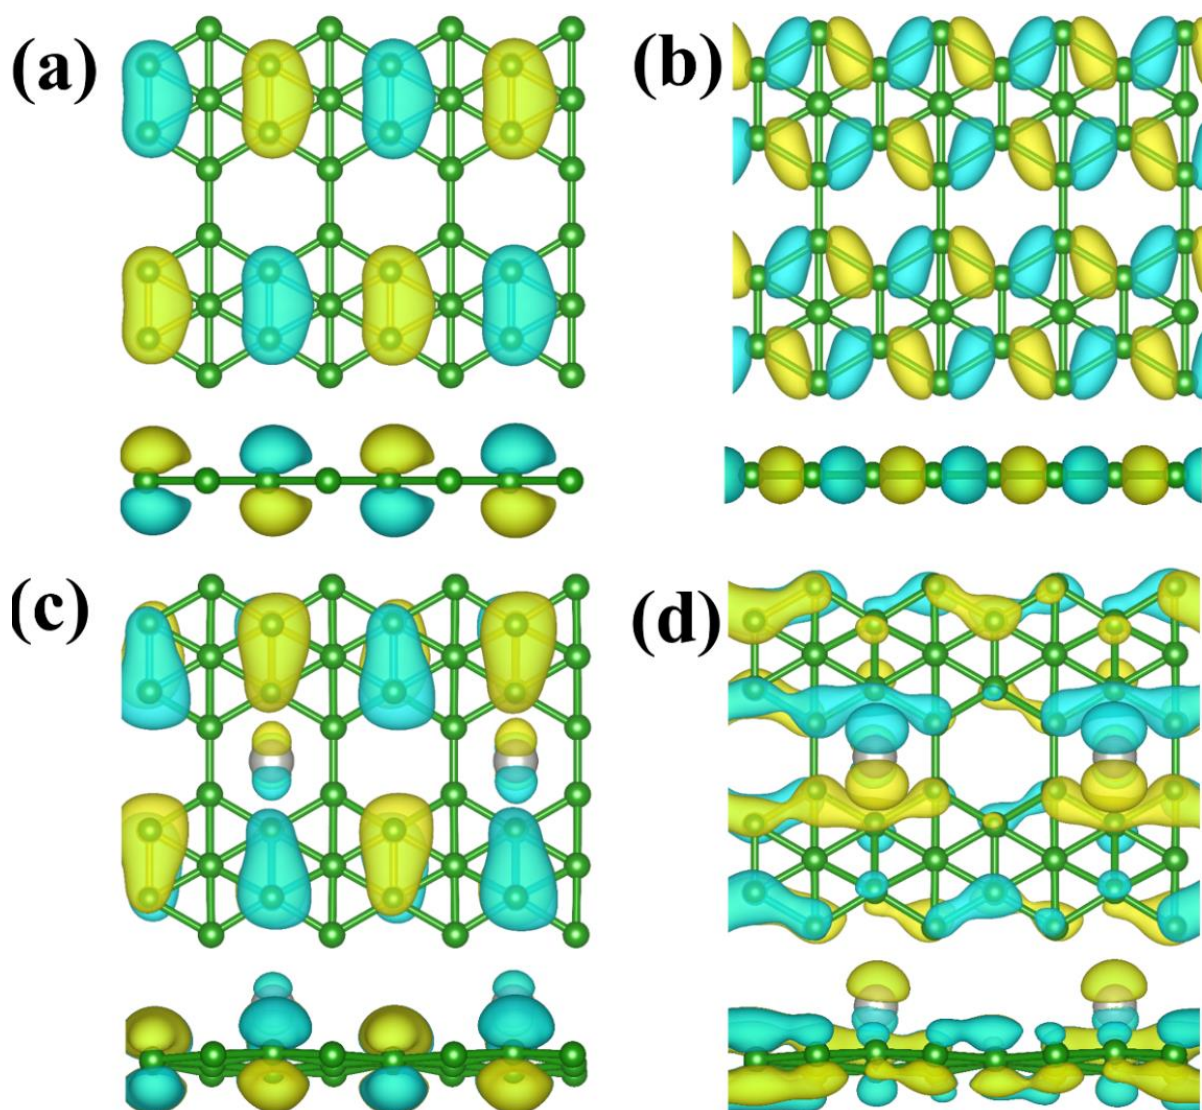

**Fig. S11.** Charge density distribution (CDD) plot of borophene in (a) valence band and (b) conduction band. CDD plot of Pd-B in (c) valence band, and (d) conduction band.

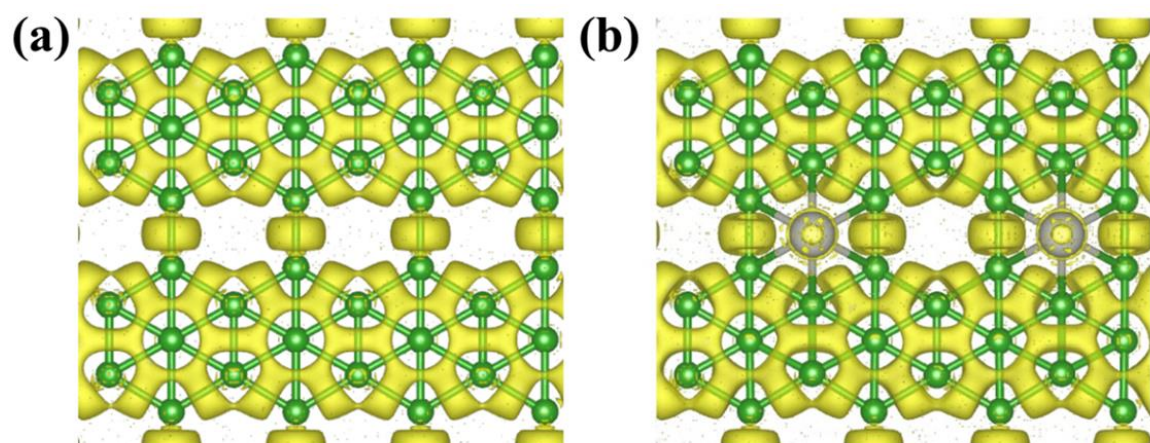

**Fig. S12.** Electron localization function plot for (a)  $\beta_{12}$  borophene sheet and (b) Pd-B.

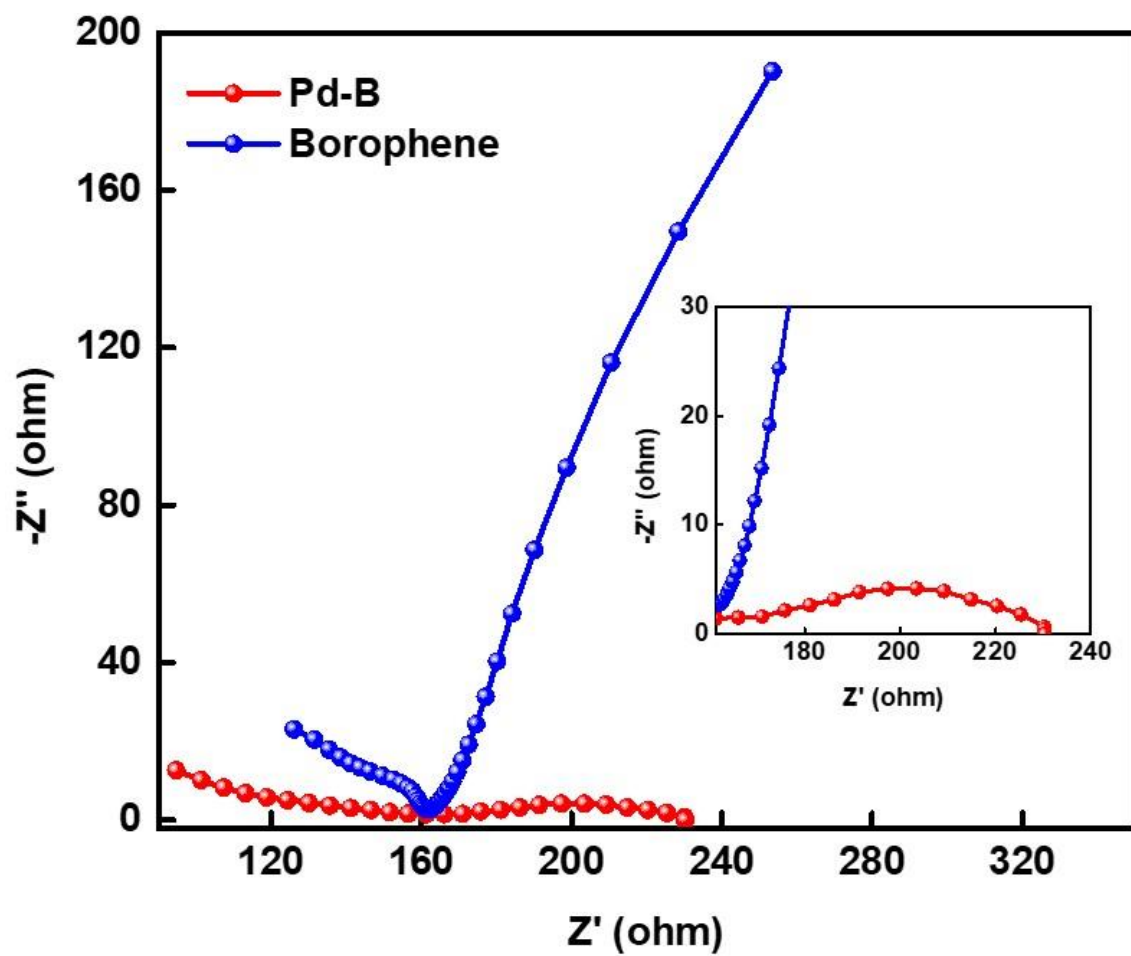

**Fig. S13.** Nyquist plots of borophene and Pd-B.

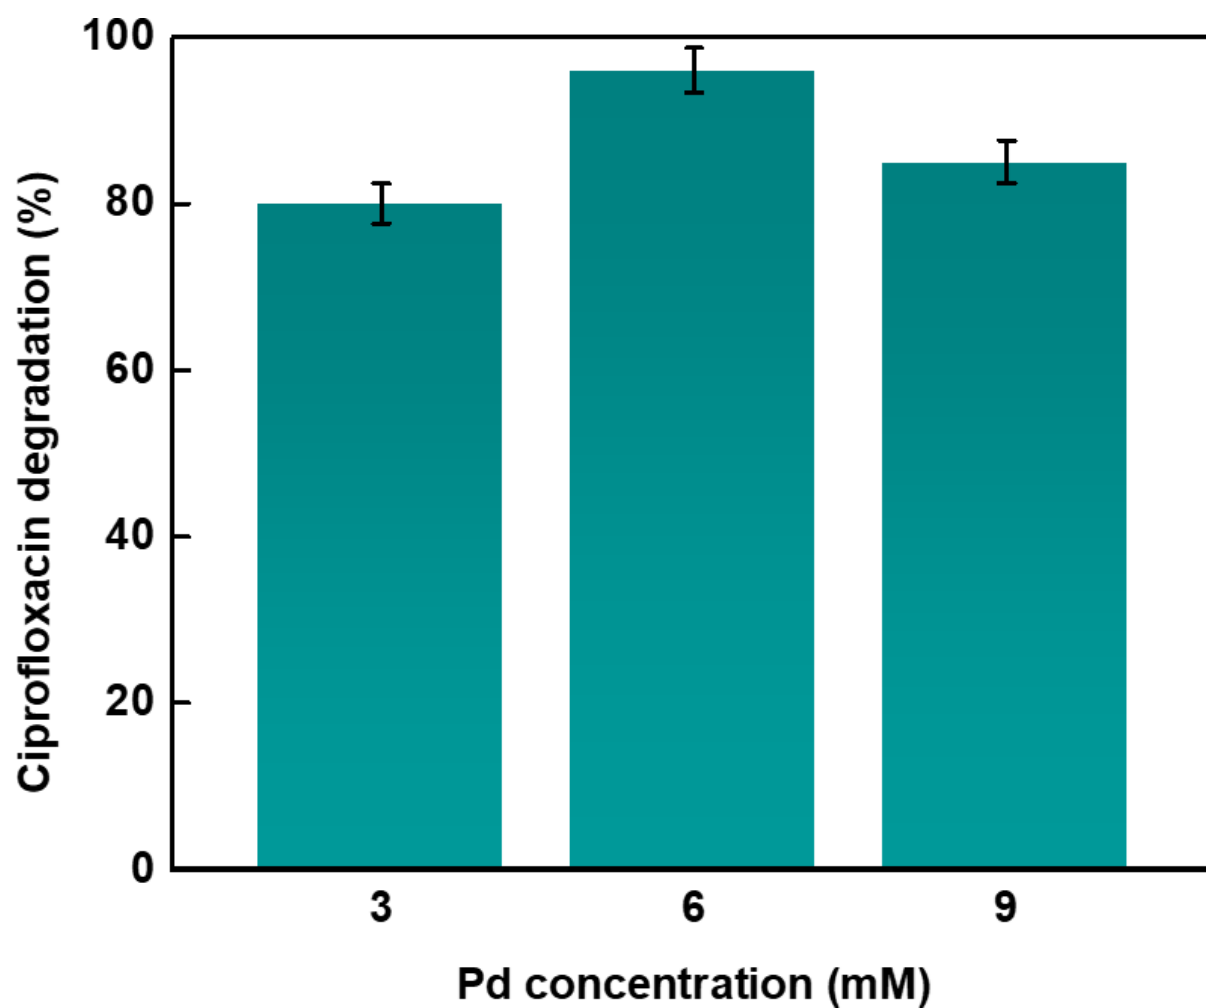

**Fig. S14.** Effect of palladium concentration used for preparing Pd-B on CIP degradation where highest degradation is achieved with catalyst having B:Pd = 19.1:1.

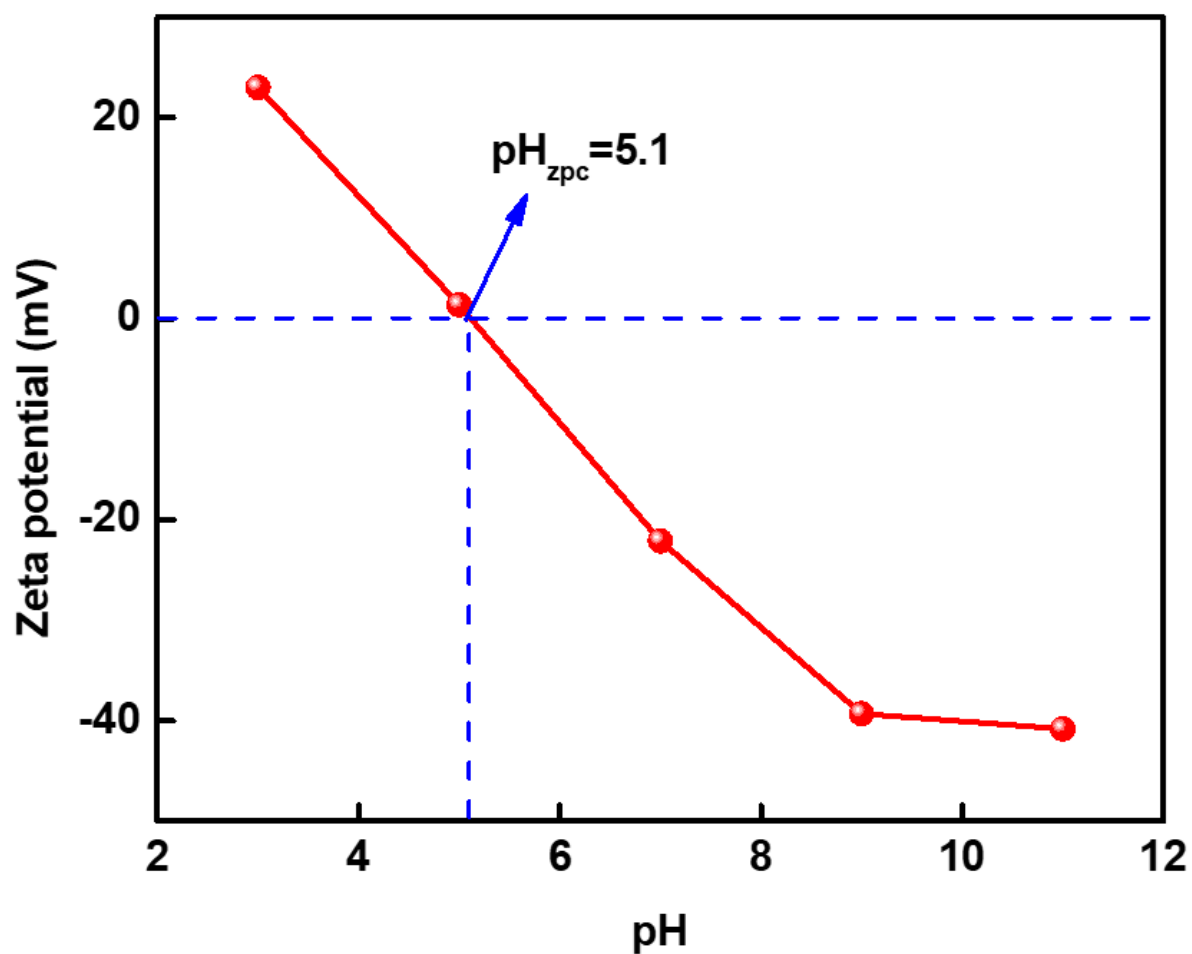

**Fig. S15.** Variation in zeta potential of Pd-B catalyst at different pH suggests that catalyst surface is positive below pH 5.1, neutral at pH 5.1, and negative above pH 5.1.

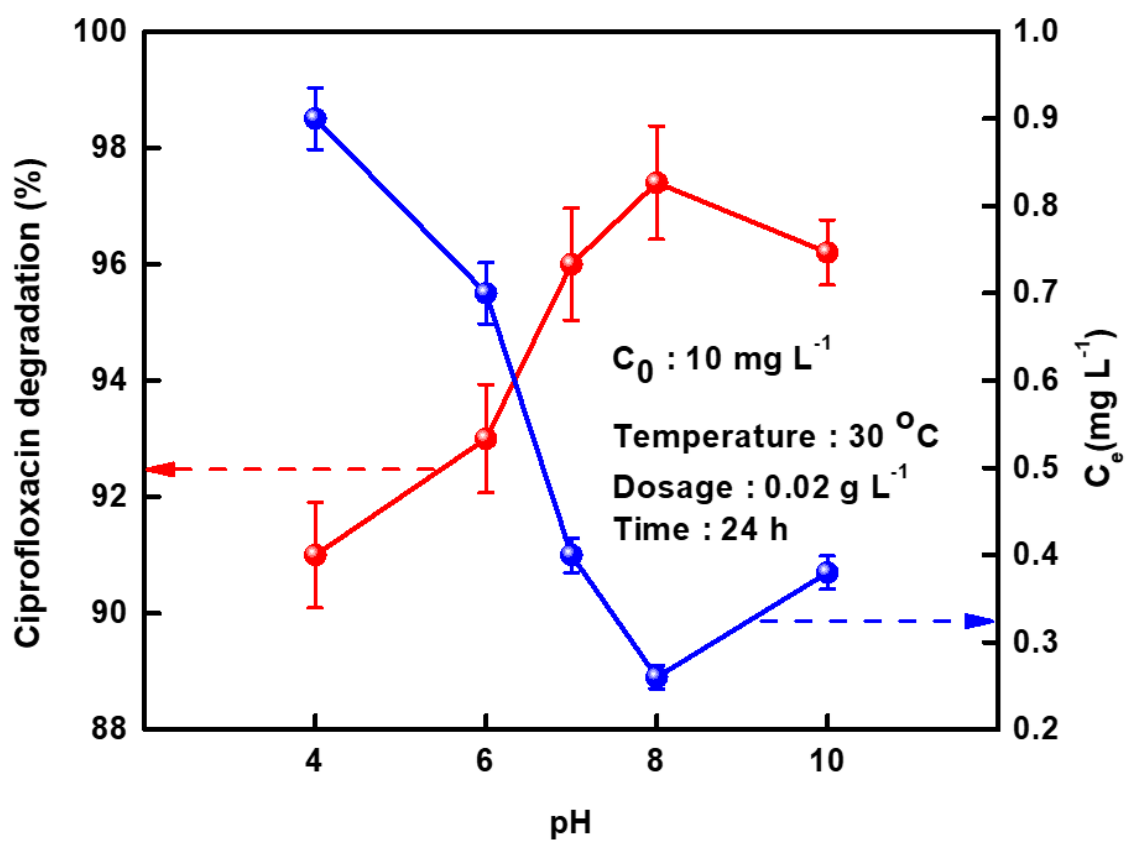

**Fig. S16.** Effect of solution pH on CIP degradation where maximum degradation is achieved at pH 8.0.

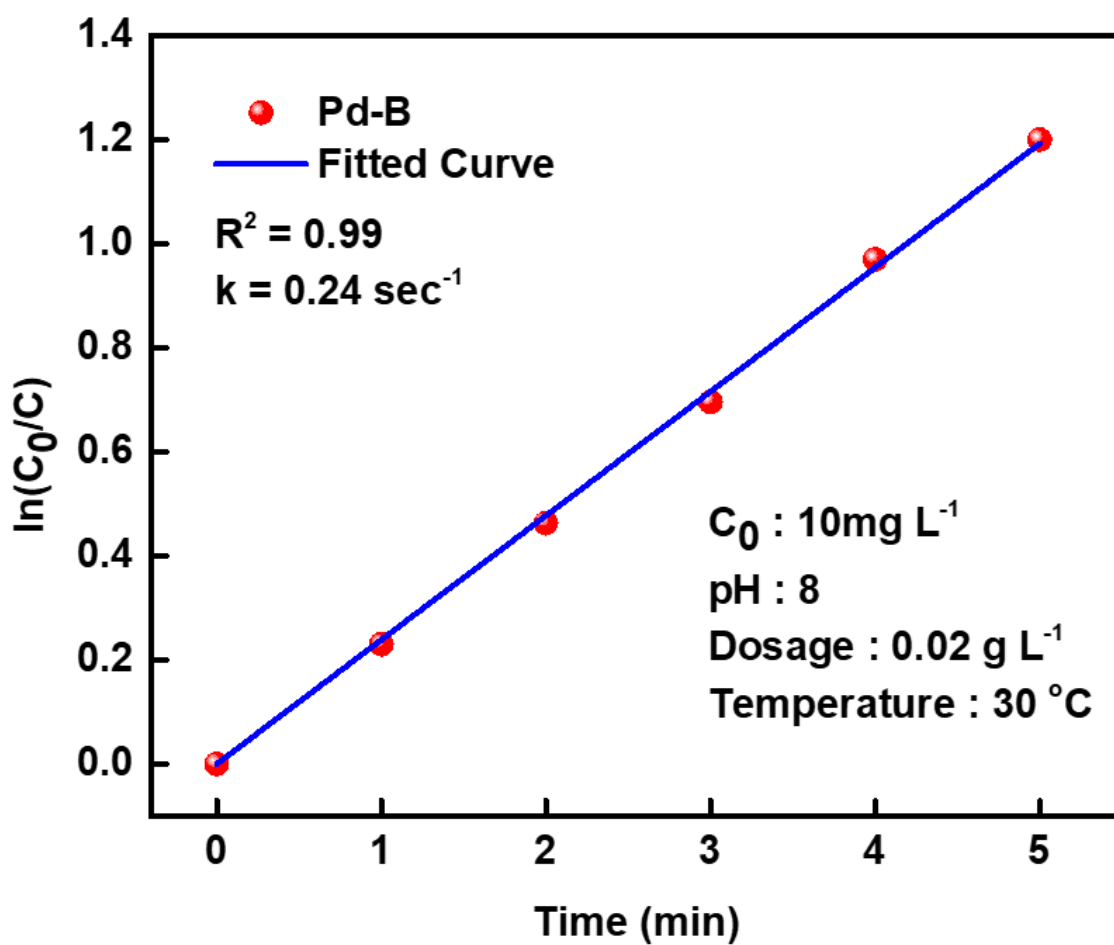

**Fig. S17.** Pseudo-first-order kinetic plot of degradation of CIP by Pd-B catalyst at optimum pH of 8.0, dose  $0.02 \text{ g L}^{-1}$ , and temperature of  $30^\circ\text{C}$ .

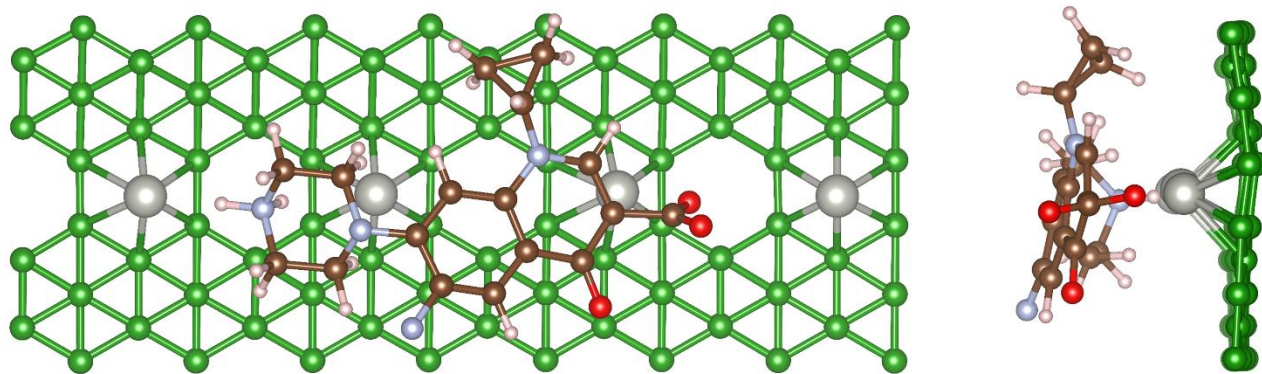

**Fig. S18.** Geometric structure optimization of drug-Pd-B conjugate by DFT.

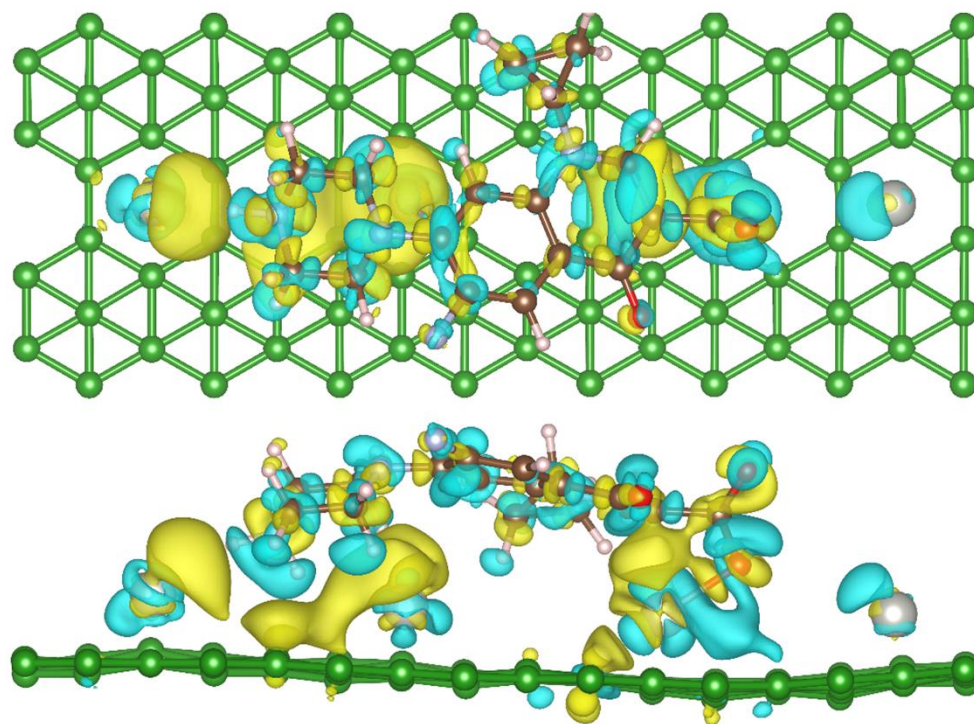

**Fig. S19.** Charge density difference analysis of drug-catalyst conjugate.

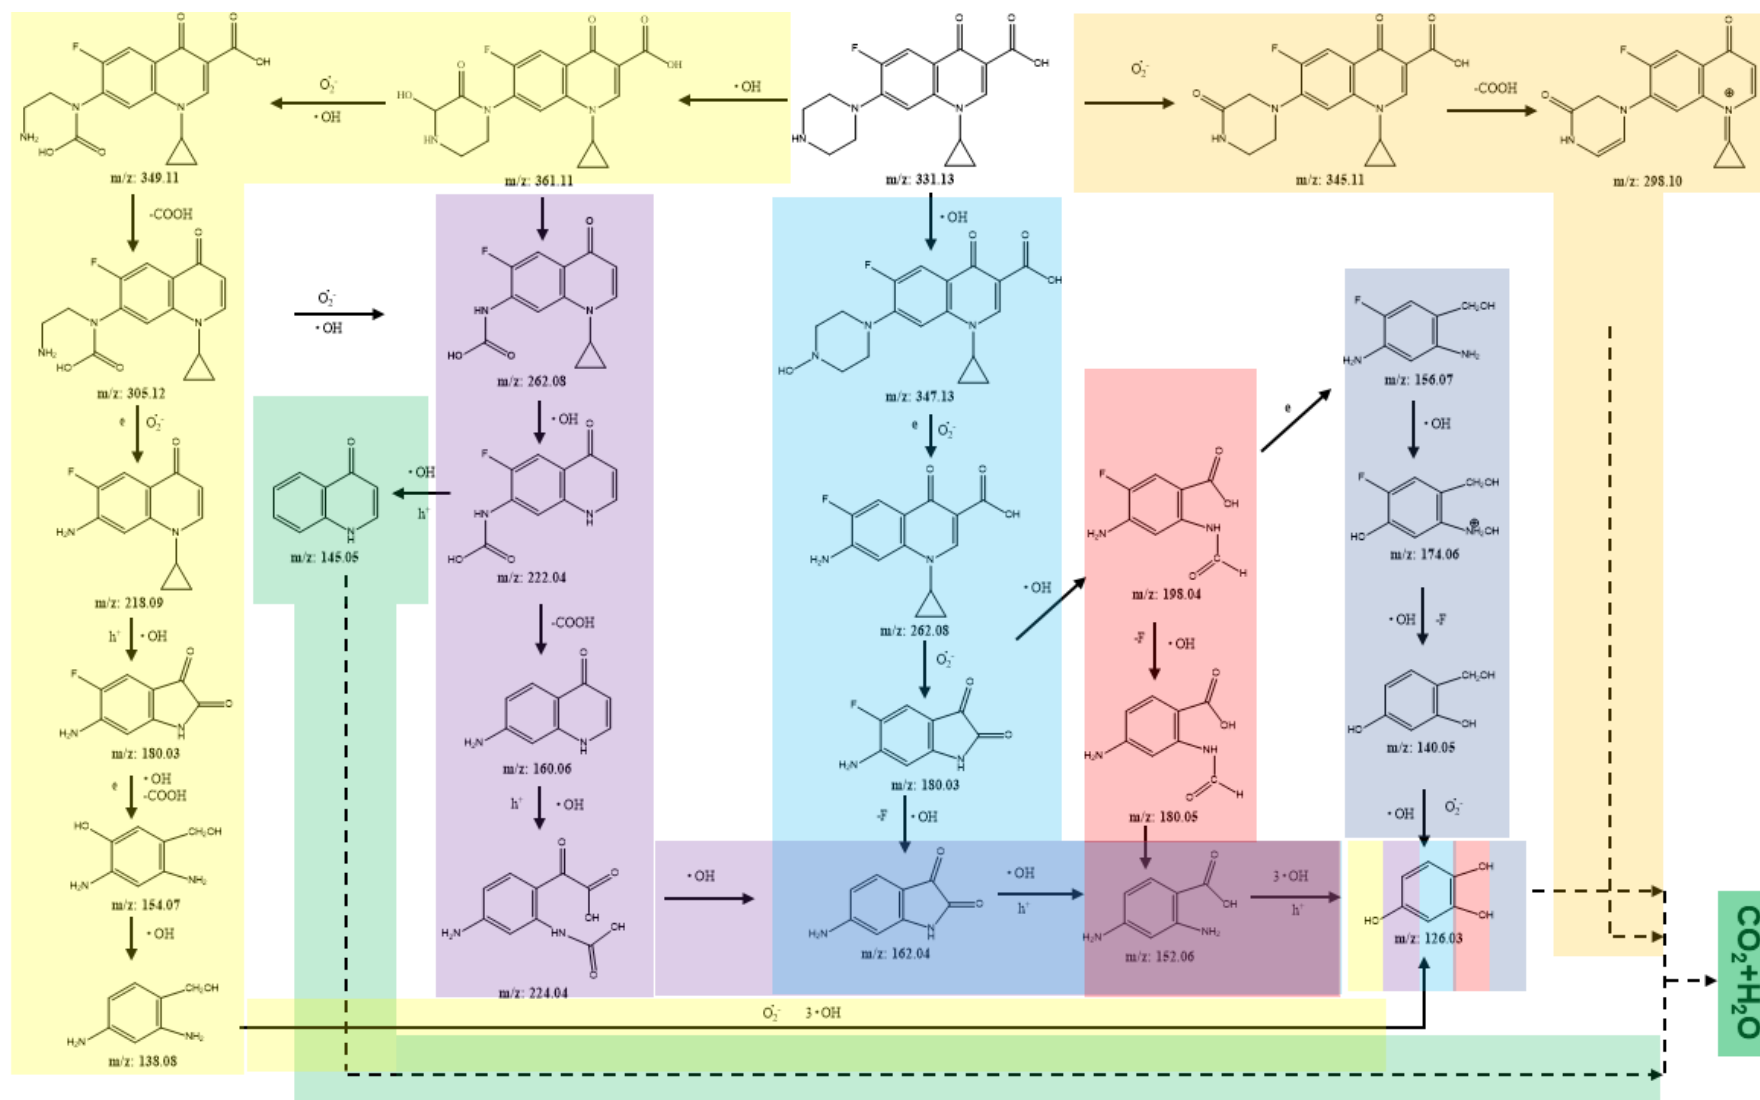

**Fig. S20.** Detailed reaction mechanism based on the predominant reactive species as observed in scavenging experiment.

**Table S1.** Details of intermediated generated during CIP degradation.

| Product No. | Chemical Structure                                                                                                                                                                              | <i>m/z</i> |
|-------------|-------------------------------------------------------------------------------------------------------------------------------------------------------------------------------------------------|------------|
| A           | 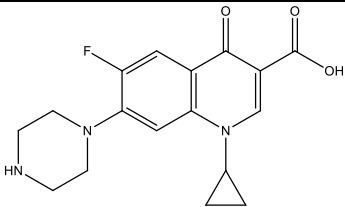 <p>1-cyclopropyl-6-fluoro-4-oxo-7-(piperazin-1-yl)-1,4-dihydroquinoline-3-carboxylic acid (CIP)</p>           | 331.13     |
| B           | 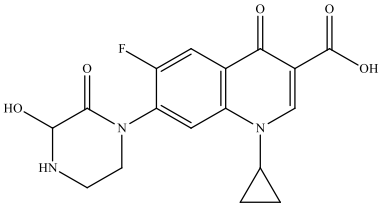 <p>1-cyclopropyl-6-fluoro-7-(3-hydroxy-2-oxopiperazin-1-yl)-4-oxo-1,4-dihydroquinoline-3-carboxylic acid</p> | 361.11     |
| C           | 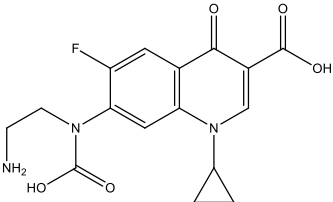 <p>7-((2-aminoethyl)(carboxy)amino)-1-cyclopropyl-6-fluoro-4-oxo-1,4-dihydroquinoline-3-carboxylic acid</p> | 349.11     |
| D           | 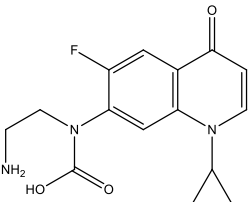 <p>(2-aminoethyl)(1-cyclopropyl-6-fluoro-4-oxo-1,4-dihydroquinolin-7-yl)carbamic acid</p>                   | 305.12     |

E

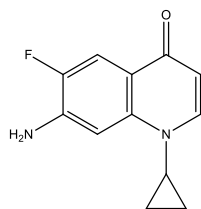

218.09

7-amino-1-cyclopropyl-6-fluoroquinolin-4(1H)-one

F

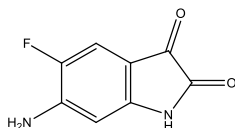

180.03

6-amino-5-fluoroindoline-2,3-dione

G

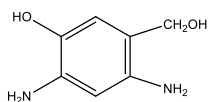

154.07

2,4-diamino-5-(hydroxymethyl)phenol

H

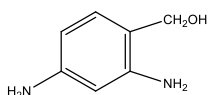

138.08

(2,4-diaminophenyl)methanol

I

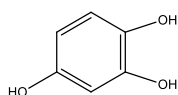

126.03

benzene-1,2,4-triol

J

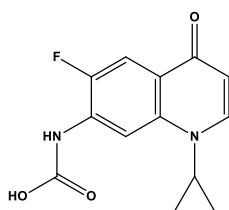

262.08

(1-cyclopropyl-6-fluoro-4-oxo-1,4-dihydroquinolin-7-yl)carbamic acid

K

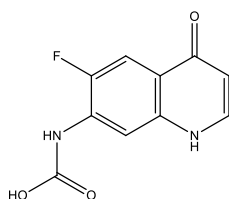

222.04

(6-fluoro-4-oxo-1,4-dihydroquinolin-7-yl)carbamic acid

L

160.06

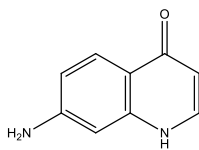

7-aminoquinolin-4(1H)-one

M

224.04

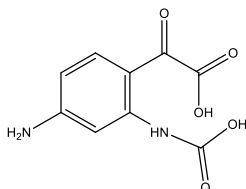

2-(4-amino-2-(carboxyamino)phenyl)-2-oxoacetic acid

N

162.04

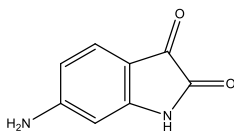

6-aminoindoline-2,3-dione

O

152.06

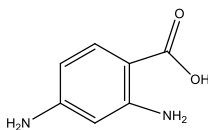

2,4-diaminobenzoic acid

P

145.05

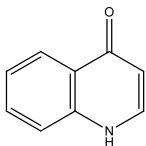

quinolin-4(1H)-one

Q

347.13

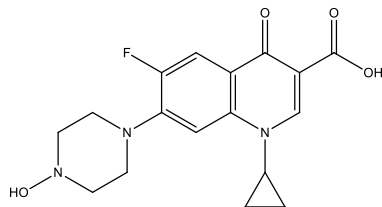

1-cyclopropyl-6-fluoro-7-(4-hydroxypiperazin-1-yl)-4-oxo-  
1,4-dihydroquinoline-3-carboxylic acid

R

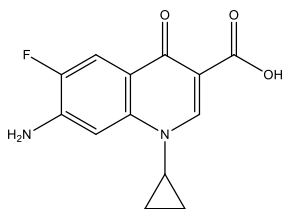

262.08

7-amino-1-cyclopropyl-6-fluoro-4-oxo-1,4-dihydroquinoline-  
3-carboxylic acid

S

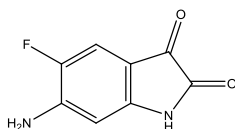

180.03

6-amino-5-fluoroindoline-2,3-dione

T

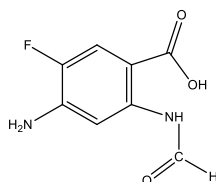

198.04

4-amino-5-fluoro-2-formamidobenzoic acid

U

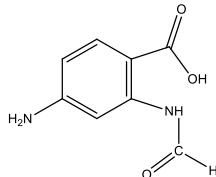

180.05

4-amino-2-formamidobenzoic acid

V

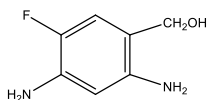

156.07

(2,4-diamino-5-fluorophenyl)methanol

W

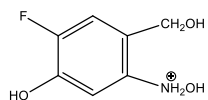

174.06

N-(4-fluoro-5-hydroxy-2-  
(hydroxymethyl)phenyl)hydroxylammonium

X

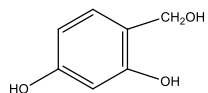

140.05

4-(hydroxymethyl)benzene-1,3-diol

Y

345.11

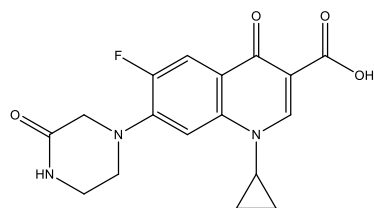

1-cyclopropyl-6-fluoro-4-oxo-7-(3-oxopiperazin-1-yl)-1,4-dihydroquinoline-3-carboxylic acid

Z

298.10

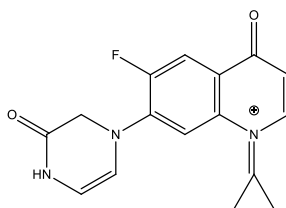

1-cyclopropylidene-6-fluoro-4-oxo-7-(3-oxo-3,4-dihydropyrazin-1(2H)-yl)-1,4-dihydroquinolin-1-ium

---

CC1

SD\_220721\_CIP 80 (1.341) Cn (Cen,2, 80.00, Ht); Cm (75:88)

1: Scan ES+  
4.30e6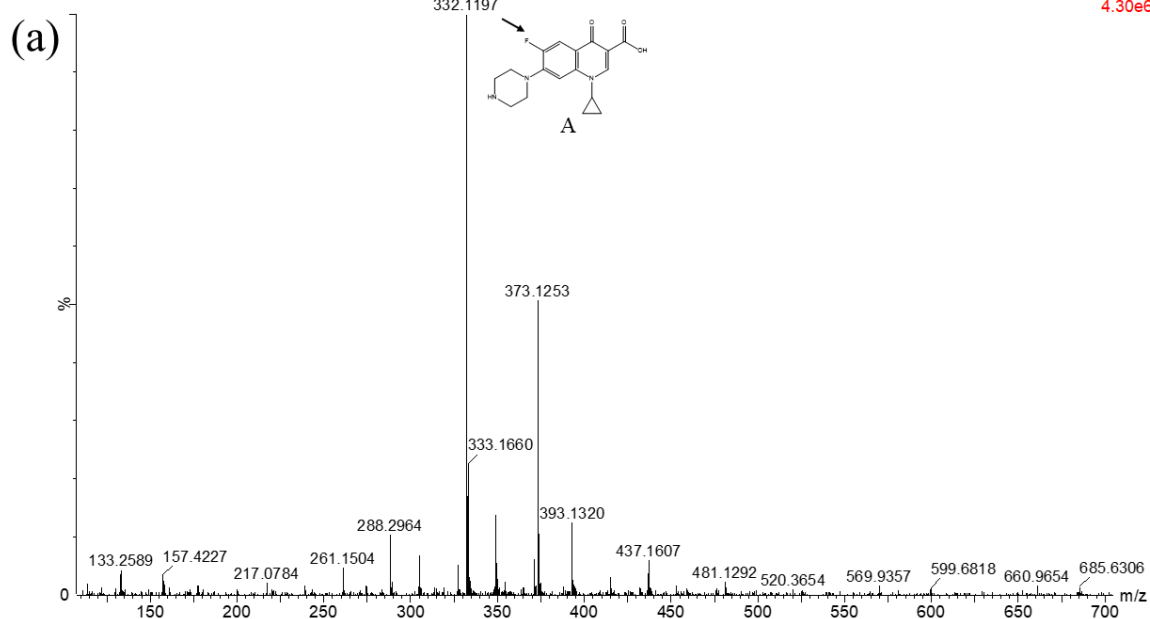

CC1

SD\_220721\_24\_79 (1.324) Cn (Cen,2, 80.00, Ht); Cm (76:85)

1: Scan ES+  
1.44e5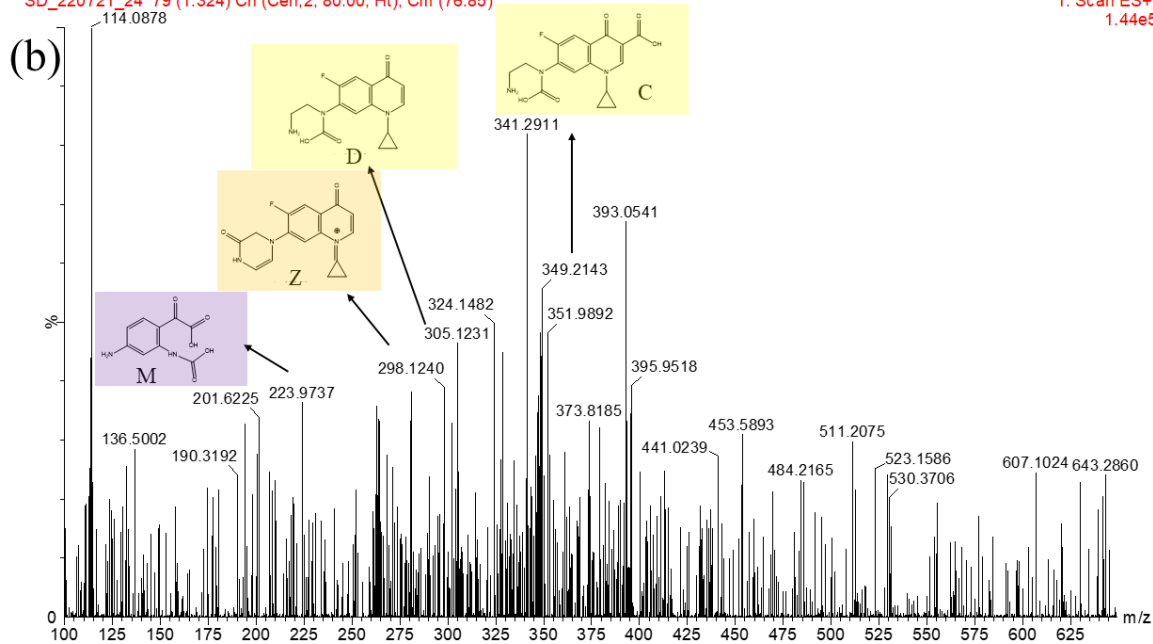

CC1

SD\_220721\_2 618 (6.115) Cn (Cen.2, 80.00, Ht); Cm (608:640)

2: Scan ES-  
5.21e5

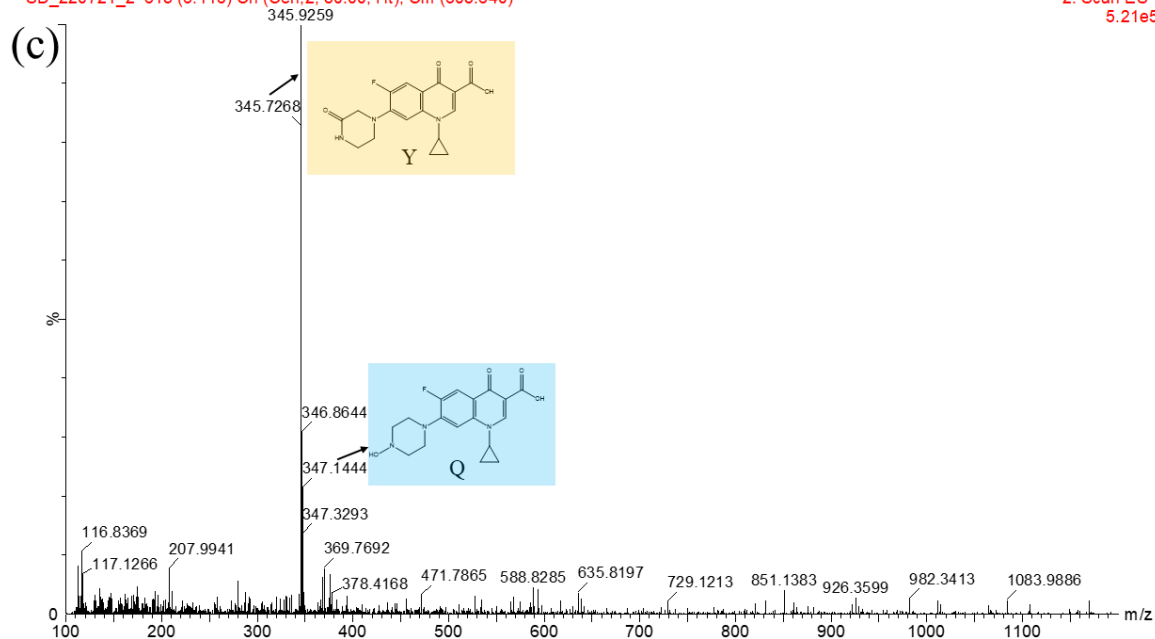

CC1

SD\_220721\_4 62 (1.045) Cn (Cen.2, 80.00, Ht); Cm (58:66)

2: Scan ES-  
4.43e5

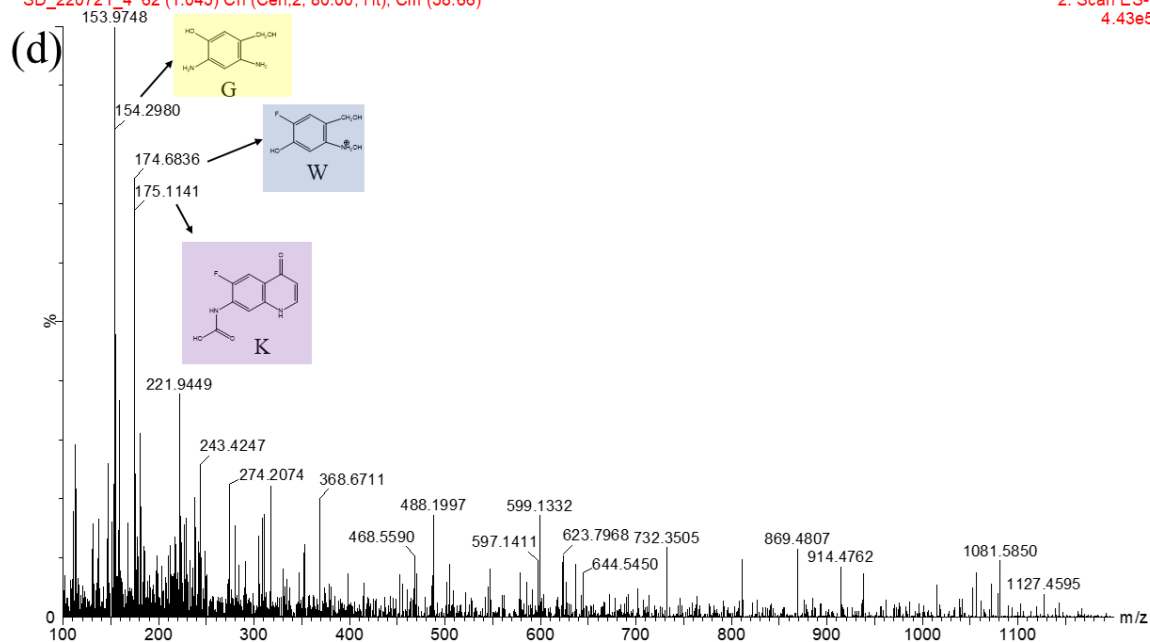

CC1

SD\_220721\_4 76 (1.282) Cn (Cen,2, 80.00, Ht): Cm (73:77)

2: Scan ES-  
1.27e6

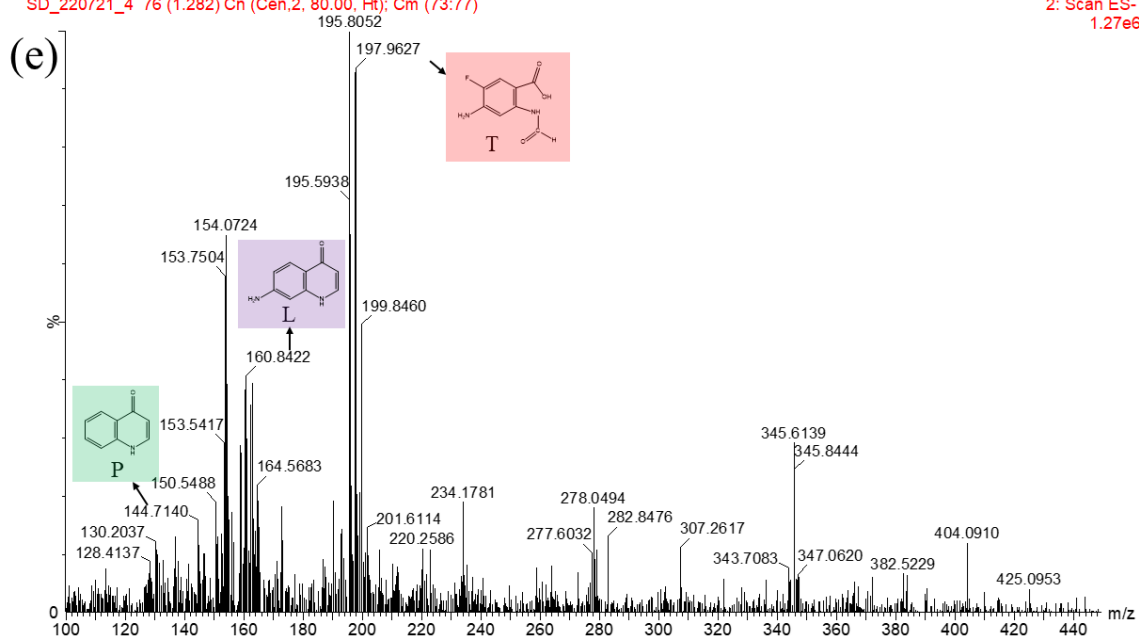

CC1

SD\_220721\_4 80 (1.341) Cn (Cen,2, 80.00, Ht): Cm (62:96)

1: Scan ES+  
1.17e5

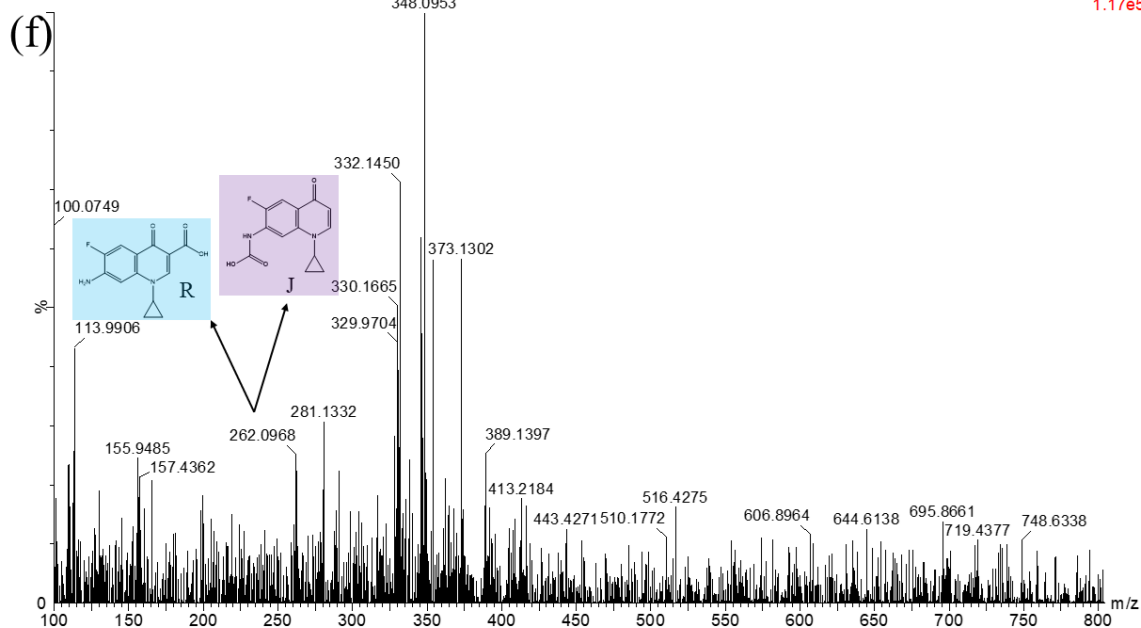

CC1

SD\_220721\_24 143 (2.413) Cn (Cen,2, 80.00, Ht); Cm (138:168)

2: Scan ES-  
4.42e5

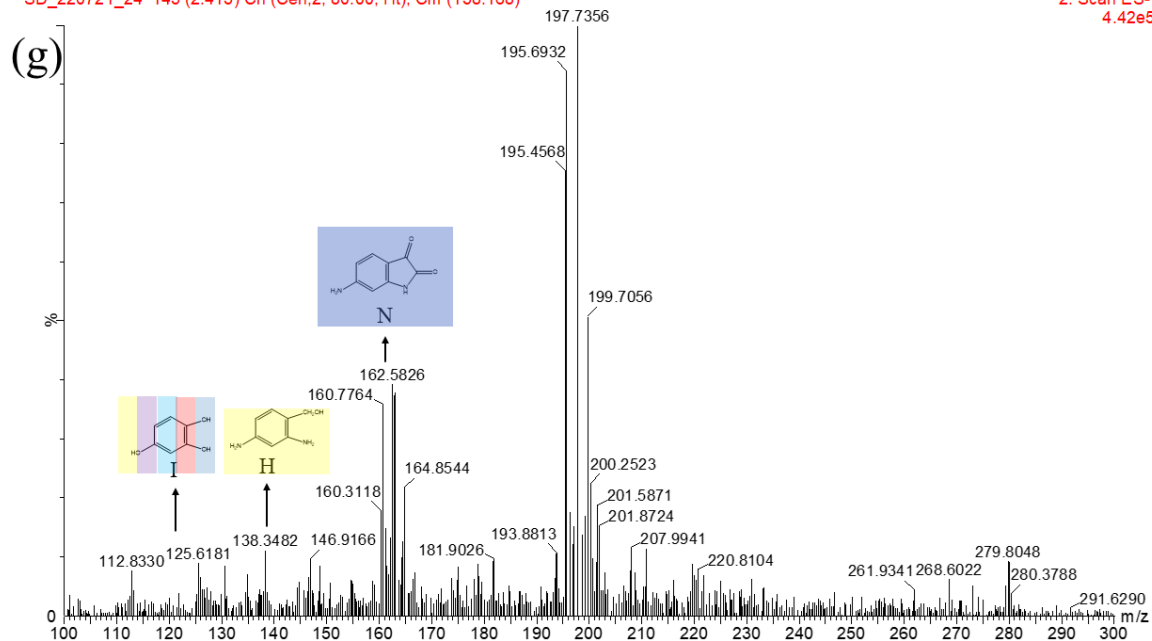

CC1

SD\_220721\_4 163 (2.750) Cn (Cen,2, 80.00, Ht); Cm (160:183)

2: Scan ES-  
1.15e5

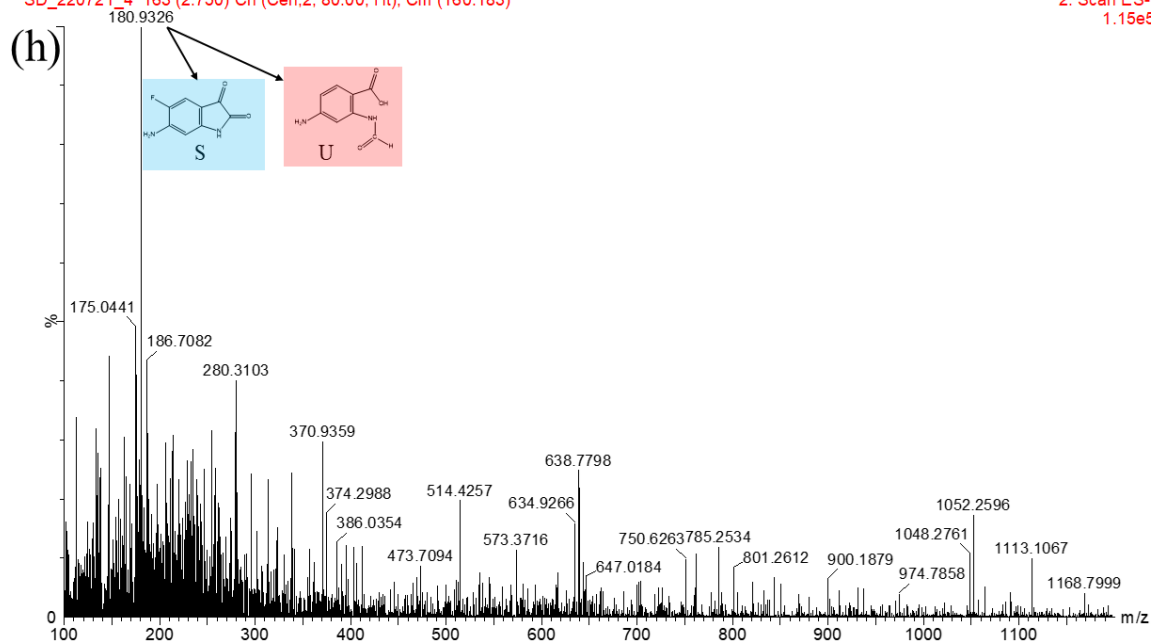

CC1

SD\_220721\_4 80 (1.341) Cn (Cen,2, 80.00, Ht); Cm (62:96)

1: Scan ES+  
1.17e5

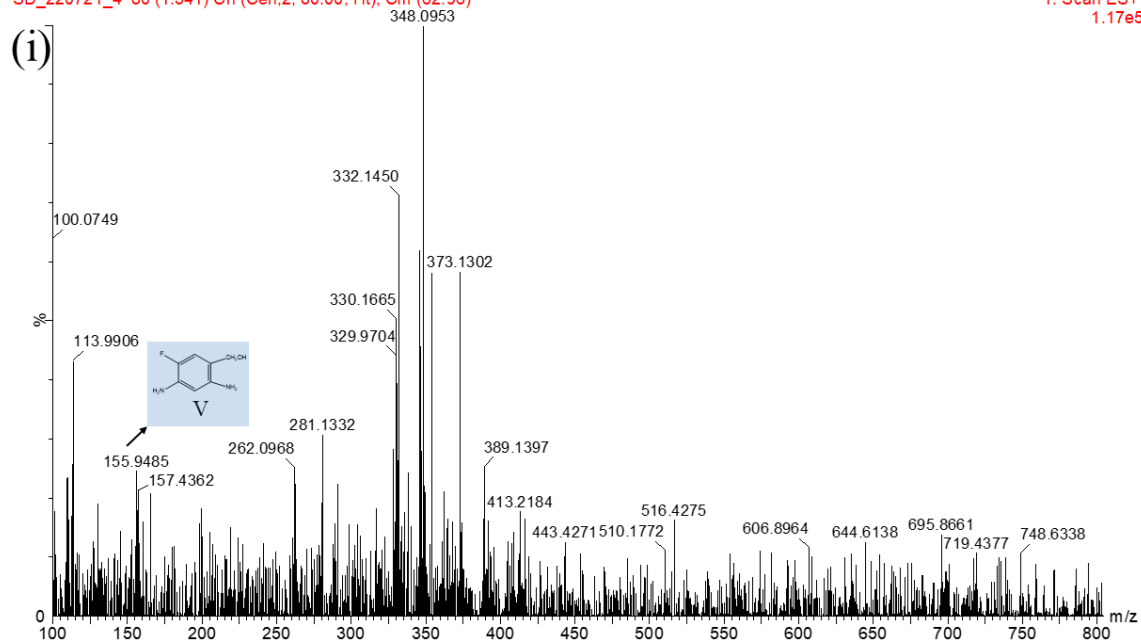

**Fig. S21.** (a-i) LC-MS spectra of different intermediates generated in CIP degradation process.

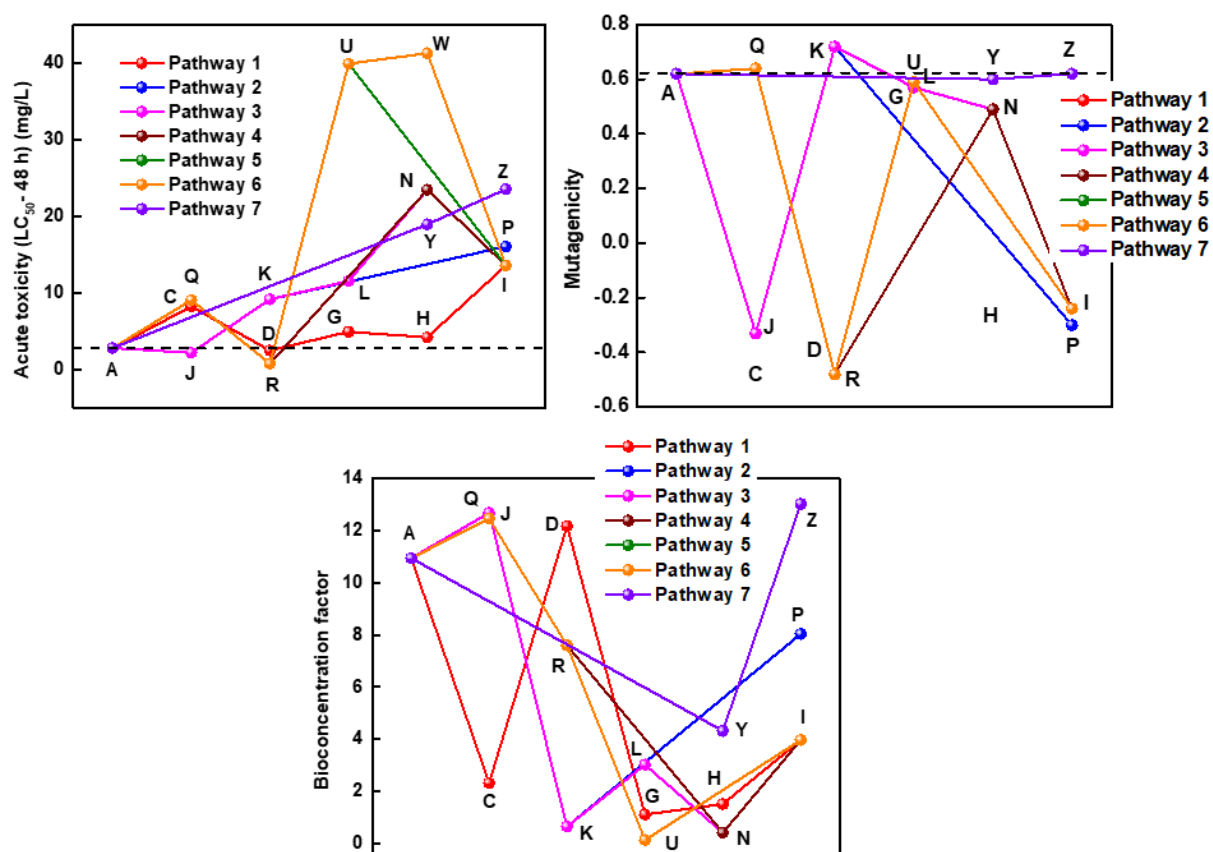

**Fig. S22.** (a) Acute toxicity, (b) Mutagenicity, and (c) Bioconcentration factor of CIP and its degradation intermediates in different proposed pathways.

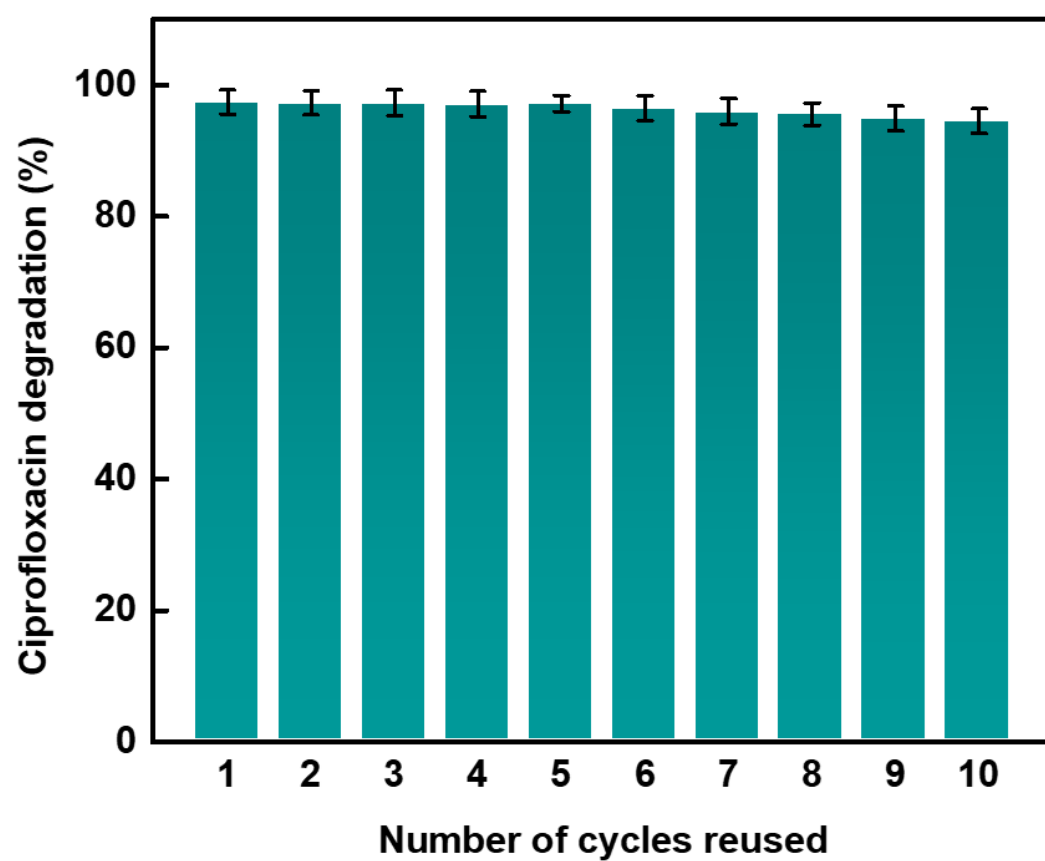

**Fig. S23.** Effect of the number of cycles reused on CIP degradation efficiency.

### S3. Comparison with other photocatalysts

Researches have reported several photocatalysts with efficient degradation capacity of CIP. A brief comparison has been presented in **Table S2**.

**Table S2.** Comparison of CIP degradation efficiency of different photocatalysts.

| Photocatalyst                                          | Dose<br>(g L <sup>-1</sup> ) | CIP conc.<br>(mg L <sup>-1</sup> ) | Source                                                                | Intensity                  | Degradation<br>efficiency                                                   | Ref.          |
|--------------------------------------------------------|------------------------------|------------------------------------|-----------------------------------------------------------------------|----------------------------|-----------------------------------------------------------------------------|---------------|
| WO <sub>3</sub> /CdWO <sub>4</sub>                     | 0.57                         | 20                                 | 500 W Xe lamp                                                         | 100 mW<br>cm <sup>-2</sup> | 93.4% (90 min)                                                              | <sup>1</sup>  |
| ZnO/CD NCs                                             | 0.6                          | 12                                 | Natural sunlight                                                      | 221 W m <sup>-2</sup>      | 98% (110 min)                                                               | <sup>2</sup>  |
| Ce/Zr MOF                                              | 1.0                          | 20                                 | 300 W Xe lamp ( $\lambda > 420$ nm)                                   | -                          | 90.8% (60 min)                                                              | <sup>3</sup>  |
| NiAl<br>LDH/Fe <sub>3</sub> O <sub>4</sub> -<br>RGO    | 0.25                         | 10                                 | 500 W Xe lamp ( $\lambda > 420$ nm)                                   | -                          | 91.36% (150 min)                                                            | <sup>4</sup>  |
| AgBr/Ag@Ag<br>2O/Ag <sub>2</sub> CO <sub>3</sub>       | 1                            | 10                                 | 300 W Xe lamp ( $\lambda > 420$ nm)                                   | -                          | 89.3% (60 min)                                                              | <sup>5</sup>  |
| Exfoliated B-<br>doped g-C <sub>3</sub> N <sub>4</sub> | 1                            | 10                                 | Solar light                                                           | -                          | 90% (60 min)                                                                | <sup>6</sup>  |
| 2D-2D ZnO/N<br>doped g-C <sub>3</sub> N <sub>4</sub>   | 0.1                          | 10                                 | 300 W Xe lamp ( $\lambda > 420$ nm)                                   | -                          | 64.4% (30 min)                                                              | <sup>7</sup>  |
| Ag-TiO <sub>2</sub> NPs                                | 0.3                          | 3                                  | Simulated natural solar<br>light ( $\lambda$ : 400 nm-1100<br>nm)     | 98 W m <sup>-2</sup>       | 92% (240 min)                                                               | <sup>8</sup>  |
| MoS <sub>2</sub> /CeO <sub>2</sub>                     | 0.5                          | 10                                 | 250 W Xe lamp ( $\lambda > 420$ nm)                                   | -                          | 88.5% (120 min)                                                             | <sup>9</sup>  |
| porous CN                                              | 1                            | 10                                 | 500 W Xe lamp ( $\lambda > 420$ nm)                                   | -                          | 79% (110 min)                                                               | <sup>10</sup> |
| 2D Bi <sub>2</sub> O <sub>2</sub> CO <sub>3</sub>      | 1                            | 10                                 | 300 W Xe lamp                                                         | -                          | 76.8% (60 min)                                                              | <sup>11</sup> |
| TiO <sub>2</sub> (Degussa<br>P25)                      | 0.5                          | 33.1                               | Oriel 459 WO <sub>3</sub> -free Xe<br>arc lamp with cut-off<br>filter | -                          | 100% (60 min,<br>$\lambda > 400$ nm)<br>88% (60 min,<br>$\lambda > 420$ nm) | <sup>12</sup> |

|                            |             |           |                                            |                                   |                                     |                      |
|----------------------------|-------------|-----------|--------------------------------------------|-----------------------------------|-------------------------------------|----------------------|
|                            |             |           |                                            |                                   | <5% (60 min,<br>$\lambda > 450$ nm) |                      |
| TiO <sub>2</sub> (Anatase) | 1           | 10        | Two 150 W Xe lamp<br>( $\lambda > 420$ nm) | -                                 | 70% (60 min,<br>$\lambda > 420$ nm) | <sup>13</sup>        |
| <b>Pd-B</b>                | <b>0.02</b> | <b>10</b> | <b>24 W white LED</b>                      | <b>1.1 mW<br/>cm<sup>-2</sup></b> | <b>76.5% (30 min)</b>               | <b>This<br/>work</b> |

## References

- 1 F. Rong, Q. Lu, H. Mai, D. Chen and R. A. Caruso, *ACS Appl. Mater. Interfaces*, 2021, **13**, 21138–21148.
- 2 I. Mukherjee, V. Cilamkoti and R. K. Dutta, *ACS Appl. Nano Mater.*, 2021, **4**, 7686–7697.
- 3 S. P. Tripathy, S. Subudhi, A. Ray, P. Behera, A. Bhaumik and K. Parida, *Langmuir*, 2022, **38**, 1766–1780.
- 4 J. Ni, J. Xue, L. Xie, J. Shen, G. He and H. Chen, *Phys. Chem. Chem. Phys.*, 2018, **20**, 414–421.
- 5 C. Liang, C.-G. Niu, M.-C. Shen, S.-F. Yang and G.-M. Zeng, *New J. Chem.*, 2018, **42**, 3270–3281.
- 6 L. Acharya, B. P. Mishra, S. P. Pattnaik, R. Acharya and K. Parida, *New J. Chem.*, 2022, **46**, 3493–3503.
- 7 F. Wang, Z. Zhu and J. Guo, *RSC Adv.*, 2021, **11**, 35663–35672.
- 8 J. Wang, L. Svoboda, Z. Němečková, M. Sgarzi, J. Henych, N. Licciardello and G. Cuniberti, *RSC Adv.*, 2021, **11**, 13980–13991.
- 9 R. Ji, Z. Zhu, W. Ma, X. Tang, Y. Liu and P. Huo, *Catal. Sci. Technol.*, 2020, **10**, 788–800.
- 10 V. Balakumar, R. Manivannan, C. Chuaicham, S. Karthikeyan and K. Sasaki, *Chem. Commun.*, 2021, **57**, 6772–6775.
- 11 H. Qin, Y. Yang, W. Shi and Y. She, *RSC Adv.*, 2021, **11**, 13731–13738.

- 12 T. Paul, P. L. Miller and T. J. Strathmann, *Environ. Sci. Technol.*, 2007, **41**, 4720–4727.
- 13 X. Liu, P. Lv, G. Yao, C. Ma, Y. Tang, Y. Wu, P. Huo, J. Pan, W. Shi and Y. Yan, *Colloids Surfaces A Physicochem. Eng. Asp.*, 2014, **441**, 420–426.
